# Supplementary material for: Factors associated with antibiotic prescribing in patients with acute respiratory tract complaints in Malta: a 1-year repeated cross-sectional surveillance study
Source: PubMed Central journal article supplement — BMJ Open. 2019 Dec 18;9(12):e032704. doi: 10.1136/bmjopen-2019-032704 (PMC6937012; doi:10.1136/bmjopen-2019-032704), 2019-12-18
Supplement: bmjopen-2019-032704.draft_revisions.pdf [file bmjopen-2019-032704.draft_revisions.pdf]

# BMJ Open

BMJ Open is committed to open peer review. As part of this commitment we make the peer review history of every article we publish publicly available.

When an article is published we post the peer reviewers' comments and the authors' responses online. We also post the versions of the paper that were used during peer review. These are the versions that the peer review comments apply to.

The versions of the paper that follow are the versions that were submitted during the peer review process. They are not the versions of record or the final published versions. They should not be cited or distributed as the published version of this manuscript.

BMJ Open is an open access journal and the full, final, typeset and author-corrected version of record of the manuscript is available on our site with no access controls, subscription charges or pay-per-view fees (<http://bmjopen.bmj.com>).

If you have any questions on BMJ Open's open peer review process please email [info.bmjopen@bmj.com](mailto:info.bmjopen@bmj.com)

# BMJ Open

## Factors associated with antibiotic prescribing in patients with acute respiratory tract complaints in Malta: a one-year repeated cross-sectional surveillance study

|                               |                                                                                                                                                                                                                                                                                                                                                                                                                                                                                                                                                                                                                                                                                                                                                                                                                                           |
|-------------------------------|-------------------------------------------------------------------------------------------------------------------------------------------------------------------------------------------------------------------------------------------------------------------------------------------------------------------------------------------------------------------------------------------------------------------------------------------------------------------------------------------------------------------------------------------------------------------------------------------------------------------------------------------------------------------------------------------------------------------------------------------------------------------------------------------------------------------------------------------|
| Journal:                      | <i>BMJ Open</i>                                                                                                                                                                                                                                                                                                                                                                                                                                                                                                                                                                                                                                                                                                                                                                                                                           |
| Manuscript ID                 | bmjopen-2019-032704                                                                                                                                                                                                                                                                                                                                                                                                                                                                                                                                                                                                                                                                                                                                                                                                                       |
| Article Type:                 | Research                                                                                                                                                                                                                                                                                                                                                                                                                                                                                                                                                                                                                                                                                                                                                                                                                                  |
| Date Submitted by the Author: | 01-Jul-2019                                                                                                                                                                                                                                                                                                                                                                                                                                                                                                                                                                                                                                                                                                                                                                                                                               |
| Complete List of Authors:     | Saliba-Gustafsson, Erika; Karolinska Institutet, Department of Public Health Sciences, Global Health – Health Systems and Policy (HSP): Improving use of medicines<br>Dunberger Hampton, Alexandra; Karolinska Institutet, Department of Public Health Sciences, Global Health – Health Systems and Policy (HSP): Improving use of medicines<br>Zarb, Peter; Mater Dei Hospital, Department of Infection Prevention and Control<br>Orsini, Nicola; Karolinska Institutet, Department of Public Health Sciences, Social Medicine<br>Borg, Michael; Mater Dei Hospital, Department of Infection Prevention and Control; University of Malta, Faculty of Medicine and Surgery<br>Lundborg, Cecilia; Karolinska Institutet, Department of Public Health Sciences, Global Health – Health Systems and Policy (HSP): Improving use of medicines |
| Keywords:                     | PRIMARY CARE, Respiratory infections < THORACIC MEDICINE, AUDIT, Antibiotic prescribing, General practitioners                                                                                                                                                                                                                                                                                                                                                                                                                                                                                                                                                                                                                                                                                                                            |
|                               |                                                                                                                                                                                                                                                                                                                                                                                                                                                                                                                                                                                                                                                                                                                                                                                                                                           |

SCHOLARONE™  
Manuscripts

1  
2  
3 1 **TITLE PAGE**  
4  
5

6 2 **Factors associated with antibiotic prescribing in patients with acute respiratory tract**  
7  
8 3 **complaints in Malta: a one-year repeated cross-sectional surveillance study**  
9

10 4 Erika A Saliba-Gustafsson<sup>1\*</sup>, Alexandra Dunberger Hampton<sup>1</sup>, Peter Zarb<sup>2</sup>, Nicola Orsini<sup>3</sup>,  
11  
12 5 Michael A Borg<sup>2,4</sup>, Cecilia Stålsby Lundborg<sup>1</sup>  
13  
14  
15

16 6 <sup>1</sup> Department of Public Health Sciences, Global Health – Health Systems and Policy (HSP):  
17  
18 7 Improving use of medicines, Karolinska Institutet, Tomtebodavägen 18A, 171 77 Stockholm,  
19  
20 8 Sweden  
21  
22

23 9 <sup>2</sup> Department of Infection Prevention and Control, Mater Dei Hospital, Msida MSD 2090,  
24  
25 10 Malta  
26  
27

28 11 <sup>3</sup> Department of Public Health Sciences, Social Medicine, Karolinska Institutet, Solnavägen  
29  
30 12 1E, 113 65 Stockholm, Sweden  
31  
32

33 13 <sup>4</sup> Faculty of Medicine and Surgery, University of Malta, Msida MSD 2080, Malta  
34

35 14 \* corresponding author  
36  
37

38 15 **Correspondence:** Erika A Saliba-Gustafsson, Karolinska Institutet, Department of Public  
39  
40 16 Health Sciences, Tomtebodavägen 18A, 171 77 Stockholm, Sweden. E-mail:  
41  
42 17 erika.saliba@ki.se. Tel: +46 (0) 72 522 4460  
43  
44

45 18 **Running title:** Factors associated with antibiotic prescribing in patients with acute  
46  
47 19 respiratory tract complaints in Malta  
48  
49

50 20 **Word count (excludes abstract, acknowledgments, tables, figures and references):**  
51

52 21 3301/4000 words  
53  
54  
55  
56  
57  
58  
59  
60

## STRUCTURED ABSTRACT

**Objectives:** To identify factors which influence general practitioners (GPs') prescription of oral antibiotics for acute respiratory tract complaints (aRTCs) in Malta.

**Design:** Repeated, cross-sectional surveillance study.

**Setting:** Maltese general practice; both public sector healthcentres and private sector GP clinics.

**Participants:** 30 GPs registered on the Malta Medical Council's Specialist Register and 3 GP trainees participated. They registered data of 4831 patients of all ages suffering from any acute respiratory tract complaint. Data were collected monthly between May 2015 and April 2016 during pre-determined 1 week periods.

**Outcome measures:** The outcome of interest was antibiotic prescription (yes/no), defined as an oral antibiotic prescription issued for an aRTC during an in-person consultation, irrespective of the number of antibiotics given. The association between GP-, practice- and consultation-level factors, patient sociodemographic factors and patient health status factors, and antibiotic prescription was investigated.

**Results:** The antibiotic prescription rate was 45%. Independent factors positively associated with antibiotic prescribing included female GP sex (95% CI 1.22-4.26), GP age with GPs  $\geq 60$  being the most likely (95% CI 14.14-84.98), patient age with patients  $\geq 65$  being the most likely (95% CI 1.71-3.18), number of signs and/or symptoms with patients having  $\geq 4$  being the most likely (95% CI 5.78-15.99), fever (95% CI 2.08-3.26), productive cough (95% CI 1.03-1.61), otalgia (95% CI 1.01-1.76), tender cervical nodes (95% CI 1.57-3.05), regular clients (95% CI 1.05-1.66), antibiotic requests (95% CI 2.52-8.99) and smoking (95% CI 1.13-1.71). Conversely, patients with non-productive cough (95% CI 0.26-0.41), sore throat

1  
2  
3 45 (95% CI 0.53-0.78), rhinorrhoea (95% CI 0.23-0.36) or dyspnoea (95% CI 0.41-0.83), were  
4  
5 46 less likely to receive an antibiotic prescription.  
6  
7

8 47 **Conclusions:** Antibiotic prescribing for aRTCs was high and influenced but a number of  
9  
10 48 factors. Potentially inappropriate prescribing in primary care can be addressed through multi-  
11  
12 49 faceted interventions addressing modifiable factors associated with prescription.  
13  
14

15 50 **Trial registration number:** NCT03218930  
16  
17

18 51 **Key words:** Primary care, respiratory infections, audit, antibiotic prescribing, general  
19  
20 52 practitioners  
21  
22

23 53 **Word count:** 299/300 words  
24  
25  
26  
27  
28  
29  
30  
31  
32  
33  
34  
35  
36  
37  
38  
39  
40  
41  
42  
43  
44  
45  
46  
47  
48  
49  
50  
51  
52  
53  
54  
55  
56  
57  
58  
59  
60

## 54 STRENGTHS AND LIMITATIONS

- 55 • This is the first study in Malta which looks at factors influencing antibiotic prescribing  
56 using repeated cross-sectional surveillance data.
- 57 • The simple to complete surveillance forms were intended to aid documentation of as  
58 many aRTC cases as possible, while reducing GP dropouts and non-reporting. Given  
59 its design and incorporation into clinical practice, it may have helped reduce the effect  
60 of observation bias.
- 61 • GPs participation was voluntarily therefore it is possible that the GP sample consists  
62 of more interested in the research area or more conservative prescribers than non-  
63 participating GPs, affecting the study's representativeness.
- 64 • The audit-based nature of the study may have resulted in measurement error; GPs may  
65 have completed patient background information themselves without directly asking  
66 the patient and that variables located at the end of the surveillance sheet were left  
67 unmarked and inaccurately assumed to be non-cases.
- 68 • Since GPs were issued three-monthly feedback reports, a behaviour change  
69 intervention itself, their antibiotic prescribing rate may have been affected as a result  
70 of it.

## 71 INTRODUCTION

72 Since antibiotics were discovered they have saved lives and reduced suffering however their  
73 considerable overuse and misuse has, in part, led to the development of antibiotic resistance  
74 (ABR), threatening their effectiveness globally. Unchecked, ABR can halt and potentially  
75 reverse decades of medical progress, with severe repercussions on patient outcomes and  
76 healthcare expenditure both on an individual and societal level.<sup>1</sup> Antibiotics do not only target  
77 pathogenic bacteria; their use has long-lasting effects on gut flora and has been shown to be  
78 associated to allergy development and metabolic syndromes for example, particularly when  
79 prescribed during infancy.<sup>2</sup>

80 In Europe, a positive correlation between antibiotic use and resistance has been shown.<sup>3</sup> Most  
81 antibiotic prescriptions are provided in outpatient care, with respiratory tract infections (RTIs)  
82 being the most common diagnoses.<sup>3</sup> Studies have shown that up to 78% of patients are  
83 prescribed antibiotics for RTIs in primary care, even though an estimated 90% are viral in  
84 aetiology and thus antibiotics are seldom required.<sup>4-8</sup> Indeed, unless pneumonia is suspected,  
85 the effect of antibiotic treatment is moderate at best indicating that many antibiotic  
86 prescriptions are provided unnecessarily and without any overall patient benefit.<sup>9</sup>  
87 Consequently, a key strategy to contain ABR is to improve antibiotic use in primary care,  
88 particularly among general practitioners (GPs).

89 While primary care guidelines often recommend limited antibiotic use in RTI treatment,  
90 substantial variation exists in practical case management across countries and the evidence of  
91 over-prescribing is abundant.<sup>7,10,11</sup> The decision to prescribe an antibiotic is complex and  
92 influenced by a host of interconnected factors including, but not limited to, provider attitudes  
93 and characteristics, patient age, comorbidities, signs and symptoms, expectations,  
94 environmental and cultural factors.<sup>10,12-15</sup> Further cloaked by diagnostic uncertainty, GPs risk

1  
2  
3 95 misdiagnosing and misclassifying the aetiology of RTIs, and may prescribe antibiotics to be  
4  
5 96 on the safe side.

6  
7 97 In the latest Special Eurobarometer surveys on antibiotic resistance held in 2013 and 2016,  
8  
9 98 Malta reported the highest antibiotic consumption in Europe with 48% of Maltese respondents  
10  
11 99 reporting taking at least one antibiotic course in a calendar year.<sup>16,17</sup> Non-prescribed use was  
12  
13 100 minimal at <4%.<sup>16,17</sup> Our recently published surveillance study showed that, in 2015/16, 46%  
14  
15 101 of patients with acute respiratory tract complaints (aRTCs) were prescribed antibiotics by  
16  
17 102 their GP.<sup>5</sup> Nation-wide data on antibiotic prescribing in Maltese primary care is lacking and  
18  
19 103 Malta has only been able to provide ESAC-Net with wholesale distributor data to estimate  
20  
21 104 community antibiotic use. As a result, it has not been possible to run in-depth analysis to  
22  
23 105 elucidate factors which impact antibiotic prescribing. Since the majority of Maltese antibiotic  
24  
25 106 consumption occurs in the community and is primarily broad-spectrum,<sup>5,18,19</sup> it is essential to  
26  
27 107 identify and understand the drivers of antibiotic prescribing in primary care to develop  
28  
29 108 targeted antibiotic stewardship activities, improving their chance of success. This study aimed  
30  
31 109 to identify factors which influence GPs' prescription of oral antibiotics for aRTCs in Malta.  
32  
33  
34  
35  
36  
37

## 38 110 **METHODS**

### 39 111 **Study design, setting and participants**

40  
41  
42 112 This cross-sectional surveillance study provided baseline data for the Maltese Antibiotic  
43  
44 113 Stewardship Programme in the Community (MASPIC) project, a quasiexperimental social  
45  
46 114 marketing intervention aiming to reduce inappropriate antibiotic prescribing in Maltese  
47  
48 115 primary care. A study protocol with a detailed description of the study setting and design has  
49  
50 116 been published.<sup>20</sup> A description of GPs' antibiotic prescribing patterns at baseline has also  
51  
52 117 been presented elsewhere.<sup>5</sup> In brief, this study was carried out in public and private general  
53  
54 118 practices in Malta. A total of 370 GPs registered on the Malta Medical Council's Specialist  
55  
56 119 Register and 34 GP trainees were invited to the study. Seventy registered GPs and GP trainees  
57  
58  
59  
60

1  
2  
3 120 responded, of which 35 agreed to participate. Prior to surveillance initiation, two GPs stopped  
4  
5 121 working clinically; therefore, ultimately 30 GPs and 3 GP trainees participated.

### 122 **Patient and public involvement**

123 This study was conducted without patient or public involvement. Patients were not invited to  
124 comment on the study design and were not consulted to develop patient relevant outcomes or  
125 interpret results. Patients were neither requested to contribute to the writing or editing of this  
126 document for readability or accuracy.

### 127 **Data collection**

128 During enrolment, GPs were asked to complete a background information sheet which  
129 included information on demographics, training/experience and service delivery organisation  
130 (Figure S1). GPs registered patients seen for aRTCs during 12 pre-determined surveillance  
131 weeks (1 week/month without substitutions) between May 2015 and April 2016. Forms were  
132 filled by GPs themselves during first consultations with patients of all ages suffering from any  
133 aRTC (defined as lower- and upper-RTIs, allergies and exacerbation of  
134 COPD/asthma/bronchitis), and included information on patient and clinical factors, clinical  
135 assessment, diagnosis and prescribed medicines (Figure S2). Data on the total number of  
136 patients seen each day, regardless of complaint, were also collected.

137 Communication was maintained with GPs throughout surveillance. Each surveillance week,  
138 GPs received three text messages, one to remind them to prepare for data collection, another  
139 to initiate it and a third to conclude it. GPs were also contacted by phone at most four times  
140 during the year, to provide encouragement and address queries. Moreover, GPs received  
141 three-monthly individual- and aggregate-level feedback reports on their prescribing patterns.

### 142 **Eligibility criteria**

143 Only cases diagnosed with an aRTC were included in this study. Cases had to have been  
144 consulting with the registering GP for the first time for that presenting complaint. Any follow-

1  
2  
3 145 up visits recorded were automatically excluded. For the purpose of this analysis, all cases  
4  
5 146 diagnosed with pneumonia were excluded from the dataset. Cases where more than one  
6  
7 147 aetiology and/or diagnosis was provided or who were consulted over the phone, were also  
8  
9 148 excluded from analysis. Following data cleaning 313 aRTC cases were subsequently excluded  
10  
11  
12 149 from analysis, reducing our final sample size to 4518.

### 150 **Statistical analysis**

151 Data were analysed using Microsoft® Excel 2010 and Stata/IC® 13.1. Surveillance items not  
152 marked were assumed not present and analysed as absent. Analyses were conducted using  
153 complete case analysis. Descriptive statistics were calculated using frequencies and  
154 percentages, means and SDs, medians and IQRs as appropriate. The outcome of interest was  
155 antibiotic prescription (yes/no), defined as an oral antibiotic prescription issued for an aRTC  
156 during an in-person consultation, irrespective of the number of antibiotics given. It included  
157 both regular and delayed prescriptions, the latter to be dispensed if symptoms persisted,  
158 typically after 48 to 72 hours. It did not include 'delayed instruction', i.e. directions to follow-  
159 up for a prescription if symptoms persisted or worsened.

160 To control for clustering at GP level, potential predictors of antibiotic prescription were  
161 assessed using population averaged models using generalised estimating equations (GEE).  
162 Frequency distributions of individual explanatory variables of interest were calculated and  
163 univariable associations between each variable and antibiotic prescription were subsequently  
164 assessed using unadjusted ORs and 95% CIs. Since we could not assume linearity to the  
165 outcome, all continuous variables were categorised. Individual signs and symptoms variables  
166 were only investigated if at least 5% of aRTC cases presented with that particular symptom.  
167 Multivariate Wald-type tests were performed on multi-level categorical variables to test the  
168 hypothesis of the overall association.

1  
2  
3 169 Potential predictors were included in the multivariable model if significant at  $p < 0.2$  at  
4  
5 170 univariable level and excluded if there were issues with collinearity. A predictor was only  
6  
7 171 kept in the multivariable model if it improved the model and its  $p$ -value was less than 0.05.  
8  
9  
10 172 Ultimately 4425 aRTC cases were included in the final multivariable model.  
11  
12

## 13 173 **RESULTS**

14  
15  
16 174 In this cohort of aRTC patients, 2034 (45.0%) received an antibiotic prescription, of which  
17  
18 175 333 (16.4%) were delayed.  
19  
20

### 21 176 **GP characteristics**

22  
23 177 Most GPs were male ( $n=24$ ; 73%). Mean age (years) was  $49 \pm 12$  and mean years of GP  
24  
25 178 practice was  $23 \pm 11$ . Eleven (33%) GPs worked exclusively in the public sector whilst 20  
26  
27 179 (61%) worked in the private sector (including private pharmacy clinics). Two (6%) worked in  
28  
29 180 both sectors. Table S1 summarises the GP characteristics.  
30  
31

### 32 181 **Patient characteristics**

33  
34 182 Just over half of patients were female ( $n=2395$ ; 53.1%) and the median age was 29 years  
35  
36 183 (IQR=12-48). Over a third had completed up to secondary school education ( $n=3050$ ; 68.0%).  
37  
38 184 Smoking was reported in 735 (16.5%) cases. A summary of the patients' sociodemographic  
39  
40 185 and lifestyle characteristics is presented in Table S2.  
41  
42

### 43 186 **Factors associated with antibiotic prescribing**

44  
45 187 The univariable and multivariable associations between GP-, practice- and consultation-level  
46  
47 188 factors (Table 1), patient sociodemographic factors (Table 2), clinical factors (Table 3), and  
48  
49 189 antibiotic prescription are described below.  
50  
51

52  
53 190 Univariable analysis revealed numerous factors associated with antibiotic prescribing. At GP-  
54  
55 191 level, GP age was identified as an important predictor with GPs aged 60 and older being most  
56  
57 192 likely to prescribe antibiotics. At consultation-level, regular clients and patients who asked for  
58  
59 193 antibiotics were more likely to receive an antibiotic prescription. Patient sociodemographic  
60

194 factors associated with antibiotic prescription included female sex, patient age particularly  
195 those aged 65 and older and being a smoker. Finally, a number of patient health status factors  
196 were significantly associated with antibiotic prescription at univariable level, with the most  
197 important being fever  $>38.5^{\circ}\text{C}$ , tender cervical nodes and total number of signs and/or  
198 symptoms with the odds of prescription increasing as the number increased.

199 In the final multivariable model, female GPs were 2.3 times more likely to prescribe  
200 antibiotics (95% CI 1.22-4.26) and, compared to younger GPs aged between 28 and 39 years,  
201 GPs aged 50 to 59 (OR=2.1, 95% CI 1.19-3.77) or 60 years and older (OR=34.7, 95% CI  
202 14.14-84.98) were more likely to prescribe antibiotics. Increasing patient age also increased  
203 the likelihood of receiving an antibiotic prescription, with patients aged 65 and older being the  
204 most likely to receive a prescription (OR=2.3, 95% CI 1.71-3.18). The more signs and/or  
205 symptoms a patient presented with, the more likely they were to be given an antibiotic, with  
206 patients having four or more signs and/or symptoms being the most likely (OR=9.6, 95% CI  
207 5.78-15.99). Additionally, patients with fever  $>38.5^{\circ}\text{C}$  (OR=2.6, 95% CI 2.08-3.26),  
208 productive cough (OR=1.3, 95% CI 1.03-1.61), otalgia (OR=1.3, 95% CI 1.01-1.76), tender  
209 cervical nodes (OR=2.2, 95% CI 1.57-3.05), regular clients (OR=1.3, 95% CI 1.05-1.66),  
210 patients who requested antibiotics (OR=4.8, 95% CI 2.52-8.99) and smokers (OR=1.4, 95%  
211 CI 1.13-1.71), were also more likely to be prescribed an antibiotic. Finally, patients with non-  
212 productive cough (OR=0.3, 95% CI 0.26-0.41), sore throat (OR=0.6, 95% CI 0.53-0.78),  
213 rhinorrhoea (OR=0.3, 95% CI 0.23-0.36) or dyspnoea (OR=0.6, 95% CI 0.41-0.83), were less  
214 likely to be given an antibiotic prescription.

## 215 DISCUSSION

216 This is the first study in Malta that identifies factors associated with antibiotic prescribing for  
217 aRTCs in the community, using surveillance data. While univariable analysis revealed  
218 numerous factors associated with antibiotic treatment, multivariable analysis identified

1  
2  
3 219 several independent predictors of antibiotic prescription at different levels – provider, patient,  
4  
5 220 consultation and clinical.  
6  
7

8 221 Our results pertaining to GP factors both converge and diverge from prior research. Similar to  
9  
10 222 Akkerman et al.,<sup>21</sup> more years of GP experience was associated with increased antibiotic  
11  
12 223 treatment. In contrast, an Italian study concluded the opposite, although the antibiotic  
13  
14 224 prescribing of both GPs and paediatricians in children was investigated.<sup>22</sup> Although we did  
15  
16 225 not investigate years of GP practice specifically due to collinearity issues, we found a positive  
17  
18 226 association between GP age and antibiotic prescription, which reflects the GPs' years of  
19  
20 227 practice. In Malta, family medicine was recognised as a specialty in 2004, after which doctors  
21  
22 228 were legally required to undergo specialist training in family medicine. Through the  
23  
24 229 'grandfather clause', doctors who started training in Malta before November 2003 were  
25  
26 230 eligible to acquire specialisation under certain criteria, essentially exempting them from  
27  
28 231 specialist training.<sup>23</sup> Lower antibiotic prescribing among younger GPs could be explained by  
29  
30 232 the fact that they have more recently undergone specialist training. Older GPs may engage in  
31  
32 233 more habitual behaviour and be in greater need of refresher courses and information on the  
33  
34 234 latest antibiotic prescription guidelines.  
35  
36  
37  
38  
39

40 235 In our study, antibiotic treatment increased significantly with age, with the elderly ( $\geq 65$  years)  
41  
42 236 most likely to receive a prescription. The age-range of patients included in similar studies  
43  
44 237 varies widely, with most only looking at patient subsets, making it difficult to compare  
45  
46 238 findings on age. While we share similar results as studies carried out in Holland and  
47  
48 239 Australia,<sup>24,25</sup> in England/Wales and Sweden, high rates of antibiotic treatment were found  
49  
50 240 among the elderly and children alike.<sup>26,27</sup> Given that young children are more likely to visit  
51  
52 241 their paediatrician in Malta, it is possible that more severe cases were missed in this study and  
53  
54 242 that the youngest age groups are underrepresented. The higher prescription rates among the  
55  
56  
57  
58  
59  
60

1  
2  
3 243 elderly in Malta could suggest an augmented concern for their vulnerability towards severe  
4  
5 244 infections, and an understanding that aRTCs in children are likely viral in origin.

6  
7  
8 245 Similar to other studies,<sup>28–30</sup> being a current smoker was identified as an independent  
9  
10 246 predictor of antibiotic prescribing. Doctors may feel that smokers will deteriorate without  
11  
12 247 antibiotics, however there is no evidence that antibiotics provide smokers greater clinical  
13  
14  
15 248 benefit or faster recovery.<sup>29</sup> Fever, productive cough, otalgia or tender cervical nodes were  
16  
17 249 also found to be independent predictors of antibiotic prescribing. Conversely, presenting with  
18  
19 250 a sore throat, non-productive cough, rhinorrhoea or dyspnoea lead to a decreased likelihood of  
20  
21  
22 251 prescription. Fever is frequently reported as a significant predictor of antibiotic  
23  
24 252 prescription.<sup>30–32</sup> An Italian study investigating antibiotic prescription in young children,  
25  
26 253 similarly found that otalgia, cervical adenopathy or absence of rhinorrhoea among others were  
27  
28  
29 254 associated with antibiotic prescription.<sup>32</sup> GPs could believe that certain clinical findings, that  
30  
31 255 are often positively associated to prescription, indicate a bacterial infection or are a precursor  
32  
33 256 for more serious illness.

34  
35  
36 257 Differentiating between bacterial and viral aetiologies based on signs and/or symptoms alone  
37  
38 258 is challenging and a likely driver of antibiotic over-prescription. Although some symptoms  
39  
40 259 suggest a possible bacterial infection and could warrant further investigation, most  
41  
42  
43 260 uncomplicated viral RTIs last 5 to 7 days and peak in severity at days 3 to 6.<sup>33</sup> Given that  
44  
45 261 most patients in this study presented within three symptomatic days, some may have  
46  
47 262 benefitted from a wait and see approach or delayed prescription, without negative  
48  
49  
50 263 consequences. In fact, a study which examined antibiotic prescribing for acute cough and its  
51  
52 264 impact on recovery across 13 European countries found similar recovery rates in patients  
53  
54 265 prescribed and not prescribed antibiotics.<sup>34</sup> The potential role individual symptoms play in  
55  
56  
57 266 inappropriate antibiotic use should not be overlooked, as an EU-study indicated that Maltese  
58  
59 267 respondents take antibiotics primarily to treat symptoms as opposed to illnesses.<sup>17</sup>  
60

1  
2  
3 268 Being a regular client also contributed to increased likelihood of antibiotic prescribing in this  
4  
5 269 study. Given the structure of primary healthcare in Malta, private sector GPs, who  
6  
7 270 simultaneously compete for business and whose patients pay out-of-pocket, may be eager to  
8  
9 271 please. In fact, research suggests that a trade-off may exist between prudent antibiotic use and  
10  
11 272 cultivating a positive doctor-patient relationship.<sup>35</sup> This is also impacted by expectations and  
12  
13 273 studies have shown that both doctors' belief that a patient expects antibiotics, and patients'  
14  
15 274 actual expectations for antibiotics are associated with antibiotic prescription.<sup>36-38</sup> Requesting  
16  
17 275 antibiotics was an important predictor of antibiotic prescription in our study. Whilst some  
18  
19 276 studies have shown that providing an antibiotic prescription to such patients increased patient  
20  
21 277 satisfaction,<sup>35,36</sup> others suggest that it does not, indicating instead that receiving information  
22  
23 278 when an antibiotic is expected but not needed is as important as receiving a prescription.<sup>39</sup>  
24  
25 279 Whilst it is imperative to understand why patients expect antibiotics and what determines  
26  
27 280 patient satisfaction in Malta, GPs need to find alternative strategies to ensure patient  
28  
29 281 satisfaction without providing an unwarranted antibiotic prescription. One strategy is  
30  
31 282 enhancing doctor-patient communication through communication skills training. Effective  
32  
33 283 communication together with information tools could facilitate decision-making and empower  
34  
35 284 doctors to decline antibiotic requests when unnecessary.<sup>40</sup> This is important as receiving an  
36  
37 285 antibiotic, particularly when expected, reinforces patients' desire for prescriptions and their  
38  
39 286 perception that they should consult a GP for a similar problem in the future.<sup>41</sup>  
40  
41 287 A study carried out in Spain also showed that having access to point-of-care tests (rapid  
42  
43 288 antigen detection tests and C-reactive protein) was associated with an 18.9% lower antibiotic  
44  
45 289 prescription rate among antibiotic-requesting patients.<sup>42</sup> Having access to rapid tests could  
46  
47 290 help GPs support their decision not to prescribe by reducing uncertainty thereby lessening the  
48  
49 291 risk that they give in to patient demand, whilst providing reassurance to patients.<sup>42,43</sup> In Malta,  
50  
51 292 point-of-care tests are largely unavailable, which may augment diagnostic uncertainty.  
52  
53  
54  
55  
56  
57  
58  
59  
60

1  
2  
3 293 Coupled with patient demand for antibiotics, this exerts prescribing pressure on GPs and may  
4  
5 294 result in an unnecessary prescription. Malta possesses a culture that scores high for  
6  
7 295 uncertainty avoidance, a cultural dimension that has consistently been reported as a potent  
8  
9 296 driver for unnecessary antibiotic use.<sup>14,15,44</sup> Efforts should be made to make low-cost, rapid  
10  
11 297 diagnostics more readily available since these could reduce diagnostic uncertainty and lessen  
12  
13 298 the pressure to prescribe an empiric antibiotic. However, their introduction must be  
14  
15 299 approached with caution to avoid introducing new elements of uncertainty, addressing system  
16  
17 300 factors such as the out-of-pocket cost of tests on the overall consultation, combined with  
18  
19 301 training and support to encourage acceptance. Likewise, patients should be informed about  
20  
21 302 the possibility of low-cost testing to avoid unnecessary antibiotic consumption, thereby  
22  
23 303 safeguarding themselves and their future.

#### 28 304 **Strengths and limitations**

30 305 Knowledge on the drivers of antibiotic prescribing in southern European countries with high  
31  
32 306 antibiotic consumption rates is largely lacking, limiting our ability to develop targeted  
33  
34 307 interventions. A first of its kind in Malta, this study paves the way for more research on  
35  
36 308 antibiotic prescribing for RTCs and other indications in the outpatient sector. The sample of  
37  
38 309 4518 aRTC cases was sufficient to analyse a large number of potential explanatory variables  
39  
40 310 in multivariable analysis. Data collection tools were adapted from materials used in previous  
41  
42 311 research<sup>45,46</sup> and piloted in the Maltese context. Through user-friendly surveillance forms, we  
43  
44 312 acquired data on provider, patient, consultation and clinical factors which could impact  
45  
46 313 antibiotic prescribing, allowing for deeper analysis of potential influencing factors compared  
47  
48 314 to studies that only examine a subset of these characteristics. The simple to complete forms  
49  
50 315 were intended to aid documentation of as many aRTC cases as possible, while reducing GP  
51  
52 316 dropouts and non-reporting. Given its design and incorporation into clinical practice, it may  
53  
54 317 have helped reduce the effect of observation bias.<sup>10</sup>  
55  
56  
57  
58  
59  
60

1  
2  
3 318 Still, this study does have limitations. Since GPs participated voluntarily, it is possible that  
4  
5 319 participants were more interested in the research area or more conservative prescribers than  
6  
7 320 non-participating GPs. Therefore our GP sample may not be representative of all Maltese  
8  
9 321 GPs. The audit-based nature of the study may have resulted in measurement error; it is  
10  
11 322 possible that GPs completed patient background information that was atypical to ask during a  
12  
13 323 normal consultation without directly asking the patient. It is also possible that variables of  
14  
15 324 interest located at the end of the surveillance sheet were left unmarked and inaccurately  
16  
17 325 assumed to be non-cases. Lastly, GPs were issued three-monthly feedback reports and since  
18  
19 326 audit and feedback is a behaviour change intervention in itself it is possible that the antibiotic  
20  
21 327 prescribing rate has been affected as a result of it. However, prior research on the association  
22  
23 328 between surveillance participation and GPs' antibiotic prescription patterns has produced  
24  
25 329 mixed results; a recent randomised control trial reported no effect.<sup>47</sup>  
26  
27  
28  
29  
30

### 31 **CONCLUSION AND IMPLICATIONS FOR RESEARCH AND POLICY**

32  
33  
34  
35 331 Our study sheds light on key drivers of community-level antibiotic prescribing for aRTCs in  
36  
37 332 Malta, providing missing scientific evidence necessary to develop tailored interventions  
38  
39 333 aimed at improving prudent antibiotic use. Furthermore, we believe that our study could help  
40  
41 334 guide antimicrobial stewardship initiatives in the community in countries with similar  
42  
43 335 sociocultural traits.

44  
45  
46 336 Addressing inappropriate antibiotic prescribing in primary care requires multifaceted  
47  
48 337 interventions that focus on educating providers and patients alike, whilst providing them with  
49  
50 338 the tools required to ensure that antibiotics are prescribed appropriately and taken only when  
51  
52 339 necessary. Although more experienced GPs could benefit from targeted antibiotic stewardship  
53  
54 340 activities, ongoing continuing medical education initiatives for all GPs are important to ensure  
55  
56 341 that appropriate antibiotic prescription practices are maintained. Communication training in  
57  
58 342 particular is needed to facilitate decision-making and empower doctors to decline antibiotic  
59  
60

1  
2  
3 343 requests. National antibiotic guidelines should include other diagnostic criteria such as  
4  
5 344 smoking status and better promote the use of delayed antibiotic prescription, particularly in  
6  
7 345 high-prescription contexts. Finally, in settings with high uncertainty avoidance, improving  
8  
9  
10 346 access to low-cost, rapid tests could prove beneficial in supporting GPs' prescribing  
11  
12 347 decisions.  
13  
14  
15  
16  
17  
18  
19  
20  
21  
22  
23  
24  
25  
26  
27  
28  
29  
30  
31  
32  
33  
34  
35  
36  
37  
38  
39  
40  
41  
42  
43  
44  
45  
46  
47  
48  
49  
50  
51  
52  
53  
54  
55  
56  
57  
58  
59  
60

For peer review only

## 349 **ACKNOWLEDGEMENTS**

350 We would like to extend our gratitude to all participating GPs for their dedication throughout  
351 this study. Thanks also to Dr Senia Rosales-Klintz for her support and for helping setting up  
352 this surveillance study. We also thank Dr Wilfred Galea (TheSynapse) and Dr Philip Sciortino  
353 (Malta College of Family Doctors) for assisting us during GP recruitment. Finally, thank you  
354 Cecilia Lindsjö and Vijaylakshmi Prabhu for helping with data input and feedback report  
355 writing, and Raycine Debono for assistance with data management.

## 356 **AUTHORS' CONTRIBUTIONS**

357 EASG, CSL and MAB were involved in the conception of the research study and design of  
358 the surveillance data collection sheet. EASG carried out all data collection and was  
359 responsible for data management throughout the study's duration. This included maintaining  
360 contact with all GPs and overseeing the writing of feedback reports which were subsequently  
361 distributed by EASG. EASG and AD cleaned the dataset. EASG ran statistical analyses with  
362 input from AD and NO. EASG was responsible for drafting the manuscript. All authors were  
363 involved in the interpretation of data and critical revision of the manuscript. EASG produced  
364 the final version of the manuscript which was approved by all authors.

## 365 **FUNDING**

366 This work was supported by Karolinska Institutet funding for doctoral education (KID-  
367 funding 3–1233/2013). It was also supported by funding available to CSL at Karolinska  
368 Institutet. This research received no other specific grant from any public, commercial or not-  
369 for-profit funding agencies.

## 370 **COMPETING INTERESTS**

371 None declared.

## 372 **ETHICAL APPROVAL**

1  
2  
3 373 The University of Malta Research Ethics Committee granted ethical approval and research  
4  
5 374 was conducted in accordance with the Declaration of Helsinki. GP participation was voluntary  
6  
7 375 and informed consent was obtained. GPs could terminate participation at any time, for any  
8  
9 376 reason, without consequence. GP identities were masked using randomly assigned unique  
10  
11 377 identification codes and no personal information was made public. Finally, all patient data  
12  
13  
14 378 collected by GPs was non-identifiable.  
15  
16  
17  
18  
19  
20  
21  
22  
23  
24  
25  
26  
27  
28  
29  
30  
31  
32  
33  
34  
35  
36  
37  
38  
39  
40  
41  
42  
43  
44  
45  
46  
47  
48  
49  
50  
51  
52  
53  
54  
55  
56  
57  
58  
59  
60

For peer review only

379 **REFERENCES**

- 380 1. World Health Organization. *Antimicrobial Resistance: Global Report on Surveillance*.  
381 Geneva: WHO, 2014.
- 382 2. Becattini S, Taur Y, Pamer EG. Antibiotic-induced changes in the intestinal microbiota  
383 and disease. *Trends Mol Med* 2016;22:458-78.
- 384 3. Goossens H, Ferech M, Vander Stichele R, *et al*. Outpatient antibiotic use in Europe and  
385 association with resistance: a cross-national database study. *Lancet* 2005;365:579-87.
- 386 4. Ababneh MA, Al-Azzam SI, Ababneh R, *et al*. Antibiotic prescribing for acute  
387 respiratory infections in children in Jordan. *Int Health* 2017;9:124-30.
- 388 5. Saliba-Gustafsson EA, Dunberger Hampton A, Zarb P, *et al*. Antibiotic prescribing for  
389 respiratory tract complaints in Malta: a 1 year repeated cross-sectional surveillance study.  
390 *J Antimicrob Chemother* 2019;74:1116-24.
- 391 6. Bagger K, Nielsen ABS, Siersma V, *et al*. Inappropriate antibiotic prescribing and  
392 demand for antibiotics in patients with upper respiratory tract infections is hardly  
393 different in female versus male patients as seen in primary care. *Eur J Gen Pract*  
394 2015;21:118-23.
- 395 7. Dekker ARJ, Verheij TJM, van der Velden AW. Inappropriate antibiotic prescription for  
396 respiratory tract indications: most prominent in adult patients. *Fam Pract* 2015;32:401-7.
- 397 8. André M, Odenholt I, Schwan A, *et al*. Upper respiratory tract infections in general  
398 practice: diagnosis, antibiotic prescribing, duration of symptoms and use of diagnostic  
399 tests. *Scand J Infect Dis* 2002;34:880-6.
- 400 9. Aabenhus R, Hansen MP, Saust LT, *et al*. Characterisation of antibiotic prescriptions for  
401 acute respiratory tract infections in Danish general practice: a retrospective registry based  
402 cohort study. *NPJ Prim Care Respir Med* 2017;27:37.

- 1  
2  
3 403 10. Cordoba G, Caballero L, Sandholdt H, *et al*. Antibiotic prescriptions for suspected  
4  
5 404 respiratory tract infection in primary care in South America. *J Antimicrob Chemother*  
6  
7 405 2017;72:305-10.  
8  
9  
10 406 11. Murphy M, Bradley CP, Byrne S. Antibiotic prescribing in primary care, adherence to  
11  
12 407 guidelines and unnecessary prescribing: an Irish perspective. *BMC Fam Pract*  
13  
14 408 2012;13:43.  
15  
16  
17 409 12. McKay R, Mah A, Law MR, *et al*. Systematic review of factors associated with antibiotic  
18  
19 410 prescribing for respiratory tract infections. *Antimicrob Agents Chemother* 2016;60:4106-  
20  
21 411 18.  
22  
23  
24 412 13. O'Connor R, O'Doherty J, O'Regan A, *et al*. Antibiotic use for acute respiratory tract  
25  
26 413 infections (ARTI) in primary care: what factors affect prescribing and why is it  
27  
28 414 important? A narrative review. *Ir J Med Sci* 2018;187:969-86.  
29  
30  
31  
32 415 14. Borg MA. National cultural dimensions as drivers of inappropriate ambulatory care  
33  
34 416 consumption of antibiotics in Europe and their relevance to awareness campaigns. *J*  
35  
36 417 *Antimicrob Chemother* 2012;67:763-7.  
37  
38  
39 418 15. Deschepper R, Grigoryan L, Lundborg CS, *et al*. Are cultural dimensions relevant for  
40  
41 419 explaining cross-national differences in antibiotic use in Europe? *BMC Health Serv Res*  
42  
43 420 2008;8:123.  
44  
45  
46 421 16. TNS Opinion & Social. *Special Eurobarometer 407: Antimicrobial Resistance*. Brussels:  
47  
48 422 European Commission, 2013.  
49  
50  
51 423 17. TNS Opinion & Social. *Special Eurobarometer 445: Antimicrobial Resistance*. Brussels:  
52  
53 424 European Commission, 2016.  
54  
55  
56 425 18. Zarb P, Borg MA. Consumption of antibiotics within ambulatory care in Malta. *Malta*  
57  
58 426 *Med J* 2011;23:13-8.  
59  
60

- 1  
2  
3 427 19. European Centre for Disease Prevention and Control. *Antimicrobial consumption*. In:  
4  
5 428 Annual epidemiological report for 2017. Stockholm: ECDC, 2018.  
6  
7  
8 429 20. Saliba-Gustafsson EA, Borg MA, Rosales-Klintz S, *et al*. Maltese Antibiotic Stewardship  
9  
10 430 Programme in the Community (MASPIC): protocol of a prospective quasiexperimental  
11  
12 431 social marketing intervention. *BMJ Open* 2017;7:e017992.  
13  
14  
15 432 21. Akkerman AE, Kuyvenhoven MM, van der Wouden JC, *et al*. Prescribing antibiotics for  
16  
17 433 respiratory tract infections by GPs: management and prescriber characteristics. *Br J Gen*  
18  
19 434 *Pract* 2005;55:114-8.  
20  
21  
22 435 22. Di Martino M, Lallo A, Kirchmayer U, *et al*. Prevalence of antibiotic prescription in  
23  
24 436 pediatric outpatients in Italy: the role of local health districts and primary care physicians  
25  
26 437 in determining variation. A multilevel design for healthcare decision support. *BMC*  
27  
28 438 *Public Health* 2017;17:886.  
29  
30  
31  
32 439 23. Specialist Accreditation Committee Malta. *Minimum Criteria for Entry to the Specialist*  
33  
34 440 *Medical Registers*. Malta: Specialist Accreditation Committee Malta, 2006.  
35  
36  
37 441 24. Haeseker MB, Dukers-Muijers NH, Hoebe CJ, *et al*. Trends in antibiotic prescribing in  
38  
39 442 adults in Dutch general practice. *PloS One* 2012;7:e51860.  
40  
41  
42 443 25. Dallas A, Magin P, Morgan S, *et al*. Antibiotic prescribing for respiratory infections: a  
43  
44 444 cross-sectional analysis of the ReCEnT study exploring the habits of early-career doctors  
45  
46 445 in primary care. *Fam Pract* 2015;32:49-55.  
47  
48  
49 446 26. Majeed A, Moser K. Age- and sex-specific antibiotic prescribing patterns in general  
50  
51 447 practice in England and Wales in 1996. *Br J Gen Pract* 1999;49:735-6.  
52  
53  
54 448 27. Ternhag A, Grunewald M, Nauclér P, *et al*. Antibiotic consumption in relation to socio-  
55  
56 449 demographic factors, co-morbidity, and accessibility of primary health care. *Scand J*  
57  
58 450 *Infect Dis* 2014;46:888-96.  
59  
60

- 1  
2  
3 451 28. Shallcross L, Beckley N, Rait G, *et al.* Antibiotic prescribing frequency amongst patients  
4  
5 452 in primary care: a cohort study using electronic health records. *J Antimicrob Chemother*  
6  
7 453 2017;72:1818-24.  
8  
9  
10 454 29. Stanton N, Hood K, Kelly MJ, *et al.* Are smokers with acute cough in primary care  
11  
12 455 prescribed antibiotics more often, and to what benefit? An observational study in 13  
13  
14 456 European countries. *Eur Respir J* 2010;35:761-7.  
15  
16  
17 457 30. Manne M, Deshpande A, Hu B, *et al.* Provider variation in antibiotic prescribing and  
18  
19 458 outcomes of respiratory tract infections. *South Med J* 2018;111:235-42.  
20  
21  
22 459 31. Fischer T, Fischer S, Kochen MM, *et al.* Influence of patient symptoms and physical  
23  
24 460 findings on general practitioners' treatment of respiratory tract infections: a direct  
25  
26 461 observation study. *BMC Fam Pract* 2005;6:6.  
27  
28  
29 462 32. Moro ML, Marchi M, Gagliotti C, *et al.* Why do paediatricians prescribe antibiotics?  
30  
31 463 Results of an Italian regional project. *BMC Pediatr* 2009;9:69.  
32  
33  
34 464 33. Wald ER, Applegate KE, Bordley C, *et al.* Clinical practice guideline for the diagnosis  
35  
36 465 and management of acute bacterial sinusitis in children aged 1 to 18 years. *Pediatrics*  
37  
38 466 2013;132:e262-80.  
39  
40  
41 467 34. Butler CC, Hood K, Verheij T, *et al.* Variation in antibiotic prescribing and its impact on  
42  
43 468 recovery in patients with acute cough in primary care: prospective study in 13 countries.  
44  
45 469 *BMJ* 2009;338:b2242.  
46  
47  
48 470 35. Ashworth M, White P, Jongsma H, *et al.* Antibiotic prescribing and patient satisfaction in  
49  
50 471 primary care in England: cross-sectional analysis of national patient survey data and  
51  
52 472 prescribing data. *Br J Gen Pract* 2016;66:e40-6.  
53  
54  
55  
56  
57  
58  
59  
60

- 1  
2  
3 473 36. Coenen S, Francis N, Kelly M, *et al.* Are patient views about antibiotics related to  
4  
5 474 clinician perceptions, management and outcome? A multi-country study in outpatients  
6  
7 475 with acute cough. *PLoS One* 2013;8:e76691.  
8  
9  
10 476 37. Cockburn J, Pit S. Prescribing behaviour in clinical practice: patients' expectations and  
11  
12 477 doctors' perceptions of patients' expectations: a questionnaire study. *BMJ* 1997;315:520-  
13  
14 478 3.  
15  
16  
17 479 38. Akkerman AE, Kuyvenhoven MM, van der Wouden JC, *et al.* Determinants of antibiotic  
18  
19 480 overprescribing in respiratory tract infections in general practice. *J Antimicrob*  
20  
21 481 *Chemother* 2005;56:930-6.  
22  
23  
24 482 39. Welschen I, Kuyvenhoven M, Hoes A, *et al.* Antibiotics for acute respiratory tract  
25  
26 483 symptoms: patients' expectations, GPs' management and patient satisfaction. *Fam Pract*  
27  
28 484 2004;21:234-7.  
29  
30  
31 485 40. Drekonja DM, Filice GA, Greer N, *et al.* Antimicrobial stewardship in outpatient  
32  
33 486 settings: a systematic review. *Infect Control Hosp Epidemiol* 2015;36:142-52.  
34  
35  
36 487 41. Butler CC, Rollnick S, Kinnersley P, *et al.* Reducing antibiotics for respiratory tract  
37  
38 488 symptoms in primary care: consolidating 'why' and considering 'how'. *Br J Gen Pract*  
39  
40 489 1998;48:1865-70.  
41  
42  
43 490 42. Llor C, Bjerrum L, Munck A, *et al.* Access to point-of-care tests reduces the prescription  
44  
45 491 of antibiotics among antibiotic-requesting subjects with respiratory tract infections.  
46  
47 492 *Respir Care* 2014;59:1918-23.  
48  
49  
50 493 43. Anthierens S, Tonkin-Crine S, Douglas E, *et al.* General practitioners' views on the  
51  
52 494 acceptability and applicability of a web-based intervention to reduce antibiotic  
53  
54 495 prescribing for acute cough in multiple European countries: a qualitative study prior to a  
55  
56 496 randomised trial. *BMC Fam Pract* 2012;13:101.  
57  
58  
59  
60

- 1  
2  
3 497 44. Andre M, Gröndal H, Strandberg EL, *et al.* Uncertainty in clinical practice: an interview  
4  
5 498 study with Swedish GPs on patients with sore throat. *BMC Fam Pract* 2016;17:56.  
6  
7  
8 499 45. Bjerrum L, Munck A, Gahrn-Hansen B, *et al.* Health Alliance for Prudent Prescribing,  
9  
10 500 Yield and Use of Antimicrobial Drugs in the Treatment of Respiratory Tract Infections  
11  
12 501 (HAPPY AUDIT). *BMC Fam Pract* 2010;11:29.  
13  
14  
15 502 46. André M, Vernby A, Odenholt I, *et al.* Diagnosis-prescribing surveys in 2000, 2002 and  
16  
17 503 2005 in Swedish general practice: consultations, diagnosis, diagnostics and treatment  
18  
19 504 choices. *Scand J Infect Dis* 2008;40:648-54.  
20  
21  
22 505 47. Hemkens LG, Saccilotto R, Reyes SL, *et al.* Personalized prescription feedback using  
23  
24 506 routinely collected data to reduce antibiotic use in primary care: a randomized clinical  
25  
26 507 trial. *JAMA Intern Med* 2017;177:176-83.  
27  
28  
29  
30  
31  
32  
33  
34  
35  
36  
37  
38  
39  
40  
41  
42  
43  
44  
45  
46  
47  
48  
49  
50  
51  
52  
53  
54  
55  
56  
57  
58  
59  
60

## TABLES AND FIGURES (1)

**Table 1. Univariable and multivariable analyses of GP-, practice- and consultation-level factors associated with antibiotic prescription**

|                                                         |                            | AB prescribed |        | AB not prescribed |        | Univariable analysis* |         | Multivariable analysis** |               |
|---------------------------------------------------------|----------------------------|---------------|--------|-------------------|--------|-----------------------|---------|--------------------------|---------------|
|                                                         |                            | n             | (%)    | n                 | (%)    | OR (95% CI)           | p-value | aOR (95% CI)             | p-value       |
| <b>GP sex</b>                                           | male                       | 1,666         | (45.1) | 2,028             | (54.9) | 1                     | 0.762   | 1                        | <b>0.010</b>  |
|                                                         | female                     | 368           | (44.7) | 456               | (55.3) | 1.10 (0.58-2.10)      |         | 2.28 (1.22-4.26)         |               |
| <b>GP age (years)</b>                                   | 28-39                      | 188           | (23.9) | 600               | (76.1) | 1                     | 0.000#  | 1                        | <b>0.000#</b> |
|                                                         | 40-49                      | 494           | (42.2) | 678               | (57.8) | 1.97 (1.05-3.70)      |         | 1.45 (0.71-2.96)         |               |
|                                                         | 50-59                      | 1,018         | (47.5) | 1,125             | (52.5) | 2.53 (1.42-4.51)      |         | 2.12 (1.19-3.77)         |               |
|                                                         | ≥60                        | 334           | (80.5) | 81                | (19.5) | 9.57 (3.78-24.21)     |         | 34.67 (14.14-84.98)      |               |
|                                                         | <10                        | 183           | (23.7) | 589               | (76.3) | 1                     | 0.026#  |                          |               |
| <b>Years of practice as a GP (n=4,502)</b>              | 10-19                      | 301           | (40.3) | 446               | (59.7) | 1.77 (0.73-4.32)      |         | –                        | –             |
|                                                         | 20-29                      | 1,051         | (49.5) | 1,074             | (50.5) | 2.81 (1.34-5.92)      |         |                          |               |
|                                                         | ≥30                        | 494           | (57.6) | 364               | (42.4) | 3.05 (1.32-7.05)      |         |                          |               |
| <b>Total no. of patients examined per day (n=4,436)</b> | <22                        | 1,090         | (49.0) | 1,135             | (51.0) | 1                     | 0.488   | –                        | –             |
|                                                         | ≥22                        | 913           | (41.3) | 1,298             | (58.7) | 0.95 (0.83-1.09)      |         |                          |               |
| <b>Type of employment</b>                               | full-time                  | 1,437         | (42.2) | 1,966             | (57.8) | 1                     | 0.217   | –                        | –             |
|                                                         | part-time                  | 597           | (53.5) | 518               | (46.5) | 1.45 (0.80-2.60)      |         |                          |               |
| <b>Type of practice<sup>†</sup></b>                     | group                      | 643           | (39.5) | 987               | (60.5) | 1                     | 0.062   | –                        | –             |
|                                                         | solo                       | 1,391         | (48.2) | 1,497             | (51.8) | 1.73 (0.97-3.08)      |         |                          |               |
| <b>Location of GP practice</b>                          | public healthcentre clinic | 318           | (34.2) | 611               | (65.8) | 1                     | 0.063#  |                          |               |
|                                                         | private GP clinic          | 897           | (46.1) | 1,050             | (53.9) | 1.98 (0.97-4.01)      |         | –                        | –             |
|                                                         | private pharmacy clinic    | 819           | (49.9) | 823               | (50.1) | 2.27 (1.10-4.68)      |         |                          |               |
| <b>Location of consultation (n=4,263)</b>               | clinic                     | 1,428         | (44.8) | 1,759             | (55.2) | 1                     | 0.016   | –                        | –             |
|                                                         | home                       | 466           | (43.3) | 610               | (56.7) | 1.20 (1.03-1.38)      |         |                          |               |
| <b>Regular client</b>                                   | no                         | 991           | (38.9) | 1,558             | (61.1) | 1                     | 0.021   | 1                        | <b>0.016</b>  |
|                                                         | yes                        | 1,043         | (53.0) | 926               | (47.0) | 1.23 (1.03-1.48)      |         | 1.32 (1.05-1.66)         |               |
| <b>Antibiotics requested</b>                            | no                         | 1,983         | (44.6) | 2,459             | (55.4) | 1                     | 0.000   | 1                        | <b>0.000</b>  |
|                                                         | yes                        | 51            | (67.1) | 25                | (32.9) | 2.46 (1.57-3.86)      |         | 4.76 (2.52-8.99)         |               |

**NOTE.** \*n=4,518 unless otherwise specified; \*\*n=4,425 in final multivariable population-averaged panel-data model using generalised estimating equations which was also adjusted for patient age, smoking status, no. of signs and symptoms, fever (>38.5°C), productive cough, non-productive cough, sore throat, rhinorrhoea, otalgia, tender cervical nodes and dyspnoea; <sup>†</sup>GPs working in public sector healthcentres were defined as group practice practitioners; AB - antibiotic; aOR - adjusted odds ratio; CI - confidence interval; GP - general practitioner; OR - odds ratio; #Wald test; p-values highlighted bold indicate independent variables statistically significant at p<0.05; '-' predictor excluded from model

## TABLES AND FIGURES (2)

**Table 2. Univariable and multivariable analyses of patient sociodemographic factors associated with antibiotic prescription**

|                                                    |                 | AB prescribed |        | AB not prescribed |        | Univariable analysis* |         | Multivariable analysis** |               |
|----------------------------------------------------|-----------------|---------------|--------|-------------------|--------|-----------------------|---------|--------------------------|---------------|
|                                                    |                 | n             | (%)    | n                 | (%)    | OR (95% CI)           | p-value | aOR (95% CI)             | p-value       |
| <b>Sex</b> (n=4,508)                               | male            | 910           | (43.1) | 1,203             | (56.9) | 1                     | 0.037   | –                        | –             |
|                                                    | female          | 1,118         | (46.7) | 1,277             | (53.3) | 1.12 (1.01-1.25)      |         |                          |               |
| <b>Age (years)</b> (n=4,511)                       | <5              | 194           | (35.7) | 350               | (64.3) | 1                     | 0.000#  | 1                        | <b>0.000#</b> |
|                                                    | 5-11            | 247           | (43.3) | 324               | (56.7) | 1.37 (1.09-1.72)      |         | 1.55 (1.15-2.08)         |               |
|                                                    | 12-17           | 164           | (5.9)  | 193               | (54.1) | 1.40 (1.08-1.80)      |         | 1.74 (1.24-2.44)         |               |
|                                                    | 18-24           | 215           | (46.0) | 252               | (54.0) | 1.47 (1.16-1.87)      |         | 1.71 (1.24-2.36)         |               |
|                                                    | 25-44           | 586           | (45.6) | 699               | (54.4) | 1.61 (1.33-1.96)      |         | 1.82 (1.40-2.37)         |               |
|                                                    | 45-64           | 367           | (46.5) | 423               | (53.5) | 1.56 (1.26-1.92)      |         | 1.72 (1.30-2.29)         |               |
|                                                    | ≥65             | 260           | (52.3) | 237               | (47.7) | 1.86 (1.47-2.35)      |         | 2.33 (1.71-3.18)         |               |
| <b>Educational level</b> (n=4,484)                 | pre-school      | 181           | (36.5) | 315               | (63.5) | 1                     | 0.002#  |                          |               |
|                                                    | primary         | 327           | (43.5) | 424               | (56.5) | 1.23 (0.99-1.53)      |         |                          |               |
|                                                    | secondary       | 850           | (47.1) | 953               | (52.9) | 1.43 (1.18-1.74)      |         |                          |               |
|                                                    | upper-secondary | 351           | (45.2) | 425               | (54.8) | 1.38 (1.11-1.71)      |         | –                        | –             |
|                                                    | tertiary        | 268           | (49.2) | 277               | (50.8) | 1.57 (1.24-1.98)      |         |                          |               |
|                                                    | none achieved   | 46            | (40.7) | 67                | (59.3) | 1.20 (0.81-1.79)      |         |                          |               |
| <b>No. of persons per household</b> (n=4,465)      | 1-2             | 551           | (50.7) | 536               | (49.3) | 1                     | 0.000#  |                          |               |
|                                                    | 3-4             | 1,131         | (42.1) | 1,556             | (57.9) | 0.74 (0.65-0.85)      |         | –                        | –             |
|                                                    | ≥5              | 328           | (47.5) | 363               | (52.5) | 0.91 (0.76-1.09)      |         |                          |               |
| <b>Contact with children &lt;5 years</b> (n=4,481) | no              | 1,290         | (44.8) | 1,591             | (55.2) | 1                     | 0.198   |                          |               |
|                                                    | yes             | 727           | (45.4) | 873               | (54.6) | 0.93 (0.82-1.04)      |         | –                        | –             |
| <b>Current smoker</b> (n=4,453)                    | no              | 1,614         | (43.4) | 2,104             | (56.6) | 1                     | 0.000   | 1                        | <b>0.002</b>  |
|                                                    | yes             | 402           | (54.7) | 333               | (45.3) | 1.64 (1.42-1.91)      |         | 1.39 (1.13-1.71)         |               |

**NOTE.** \*n=4,518 unless otherwise specified; \*\*n=4,425 in final multivariable population-averaged panel-data model using generalised estimating equations which was also adjusted for GP sex, GP age, regular client, antibiotics requested, no. of signs and symptoms, fever (>38.5°C), productive cough, non-productive cough, sore throat, rhinorrhoea, otalgia, tender cervical nodes and dyspnoea; AB - antibiotic; aOR - adjusted odds ratio; CI - confidence interval; OR - odds ratio; #Wald test; p-values highlighted bold indicate independent variables statistically significant at p<0.05; '–' predictor excluded from model

## TABLES AND FIGURES (3)

| <b>Table 3. Univariable and multivariable analyses of clinical factors associated with antibiotic prescription</b> |     |               |        |                   |        |                       |                    |                          |              |
|--------------------------------------------------------------------------------------------------------------------|-----|---------------|--------|-------------------|--------|-----------------------|--------------------|--------------------------|--------------|
|                                                                                                                    |     | AB prescribed |        | AB not prescribed |        | Univariable analysis* |                    | Multivariable analysis** |              |
|                                                                                                                    |     | n             | (%)    | n                 | (%)    | OR (95% CI)           | p-value            | aOR (95% CI)             | p-value      |
| <b>Comorbidities (n=4,218)</b>                                                                                     | no  | 1,473         | (44.5) | 1,834             | (55.5) | 1                     | 0.004              | –                        | –            |
|                                                                                                                    | yes | 442           | (48.5) | 469               | (51.5) | 1.23 (1.07-1.41)      |                    |                          |              |
| <b>Duration of symptoms (days) (n=4,470)</b>                                                                       | <1  | 135           | (35.3) | 248               | (64.7) | 1                     | 0.160 <sup>#</sup> |                          |              |
|                                                                                                                    | 1-3 | 1,369         | (46.4) | 1,581             | (53.6) | 1.26 (1.02-1.55)      |                    |                          |              |
|                                                                                                                    | 4-7 | 362           | (45.0) | 443               | (55.0) | 1.25 (0.98-1.59)      |                    | –                        | –            |
|                                                                                                                    | ≥8  | 144           | (43.4) | 188               | (56.6) | 1.34 (1.01-1.78)      |                    |                          |              |
|                                                                                                                    | 1   | 405           | (37.1) | 687               | (62.9) | 1                     | 0.000 <sup>#</sup> | 1                        | <b>0.000</b> |
| <b>No. of signs and symptoms (n=4,497)</b>                                                                         | 2   | 700           | (39.8) | 1,060             | (60.2) | 2.25 (1.90-2.68)      |                    | 2.89 (2.26-3.69)         |              |
|                                                                                                                    | 3   | 591           | (51.1) | 565               | (48.9) | 4.15 (3.42-5.03)      |                    | 6.72 (4.73-9.55)         |              |
|                                                                                                                    | ≥4  | 331           | (67.7) | 158               | (32.3) | 6.32 (4.97-8.02)      |                    | 9.62 (5.78-15.99)        |              |
|                                                                                                                    | no  | 1,070         | (33.4) | 2,138             | (66.6) | 1                     | 0.000              | 1                        | <b>0.000</b> |
| <b>Fever (&gt;38.5°C)</b>                                                                                          | yes | 964           | (73.6) | 346               | (26.4) | 4.74 (4.12-5.45)      |                    | 2.60 (2.08-3.26)         |              |
|                                                                                                                    | no  | 1,153         | (36.8) | 1,983             | (63.2) | 1                     | 0.000              | 1                        | <b>0.028</b> |
| <b>Productive cough</b>                                                                                            | yes | 881           | (63.8) | 501               | (36.2) | 2.49 (2.19-2.83)      |                    | 1.29 (1.03-1.61)         |              |
|                                                                                                                    | no  | 1,701         | (55.1) | 1,384             | (44.9) | 1                     | 0.000              | 1                        | <b>0.000</b> |
| <b>Non-productive cough</b>                                                                                        | yes | 333           | (23.2) | 1,100             | (76.8) | 0.35 (0.31-0.41)      |                    | 0.33 (0.26-0.41)         |              |
|                                                                                                                    | no  | 1,055         | (44.8) | 1,300             | (55.2) | 1                     | 0.099              | 1                        | <b>0.000</b> |
| <b>Sore throat</b>                                                                                                 | yes | 979           | (45.3) | 1,184             | (54.7) | 1.10 (0.98-1.23)      |                    | 0.64 (0.53-0.78)         |              |
|                                                                                                                    | no  | 1,530         | (53.8) | 1,312             | (46.2) | 1                     | 0.000              | 1                        | <b>0.000</b> |
| <b>Rhinorrhoea</b>                                                                                                 | yes | 504           | (30.1) | 1,172             | (69.9) | 0.41 (0.36-0.47)      |                    | 0.28 (0.23-0.36)         |              |
|                                                                                                                    | no  | 1,795         | (43.7) | 2,315             | (56.3) | 1                     | 0.000              | 1                        | <b>0.043</b> |
| <b>Otalgia</b>                                                                                                     | yes | 239           | (58.6) | 169               | (41.4) | 1.62 (1.34-1.97)      |                    | 1.33 (1.01-1.76)         |              |
|                                                                                                                    | no  | 1,777         | (42.6) | 2,397             | (57.4) | 1                     | 0.000              | 1                        | <b>0.000</b> |
| <b>Tender cervical nodes</b>                                                                                       | yes | 257           | (74.7) | 87                | (25.3) | 4.08 (3.22-5.16)      |                    | 2.19 (1.57-3.05)         |              |
|                                                                                                                    | no  | 1,908         | (44.8) | 2,350             | (55.2) | 1                     | 0.001              | 1                        | <b>0.003</b> |
| <b>Dyspnoea</b>                                                                                                    | yes | 126           | (48.5) | 134               | (51.5) | 1.51 (1.19-1.92)      |                    | 0.58 (0.41-0.83)         |              |
|                                                                                                                    | no  | 1,860         | (43.7) | 2,397             | (56.3) | 1                     | 0.000              | –                        | –            |
| <b>Sibilant rhonchi</b>                                                                                            | yes | 174           | (66.7) | 87                | (33.3) | 1.75 (1.37-2.25)      |                    |                          |              |

**NOTE.** \*n=4,518 unless otherwise specified; \*\*n=4,425 in final multivariable population-averaged panel-data model using generalised estimating equations which was also adjusted for GP sex, GP age, regular client, antibiotics requested, patient age and smoking status; AB - antibiotic; aOR - adjusted odds ratio; CI - confidence interval; OR - odds ratio; <sup>#</sup>Wald test; p-values highlighted bold indicate independent variables statistically significant at p<0.05; '-' predictor excluded from model

508

For peer review only

1  
2  
3  
4  
5  
6  
7  
8  
9  
10  
11  
12  
13  
14  
15  
16  
17  
18  
19  
20  
21  
22  
23  
24  
25  
26  
27  
28  
29  
30  
31  
32  
33  
34  
35  
36  
37  
38  
39  
40  
41  
42  
43  
44  
45  
46

SUPPLEMENTARY FILES (1)

GP code [for office use only]:

GP demographics

Date: \_\_\_\_\_

|                                                                                                           |                                         |                                                                                                                             |
|-----------------------------------------------------------------------------------------------------------|-----------------------------------------|-----------------------------------------------------------------------------------------------------------------------------|
| 1) Date of birth:                                                                                         |                                         |                                                                                                                             |
| 2) Sex: <input type="checkbox"/> Male <input type="checkbox"/> Female                                     |                                         |                                                                                                                             |
| 3) Country of birth:                                                                                      |                                         |                                                                                                                             |
| 4) Home address:                                                                                          |                                         |                                                                                                                             |
| 5) E-mail address:                                                                                        |                                         |                                                                                                                             |
| 6a) Telephone no.:                                                                                        |                                         | 6b) Mobile no.:                                                                                                             |
| 7) Country where you obtained your medical undergrad. degree:                                             |                                         |                                                                                                                             |
| 8) Years of practice as a doctor (in total):                                                              |                                         |                                                                                                                             |
| 9a) Year of specialisation in family medicine (if specialised):                                           |                                         |                                                                                                                             |
| 9b) Did you fall under the 'grandfather clause' <sup>1</sup> ?                                            |                                         | <input type="checkbox"/> Yes <input type="checkbox"/> No                                                                    |
| 9c) Are you currently a trainee?                                                                          |                                         | <input type="checkbox"/> Yes <input type="checkbox"/> No                                                                    |
| 10) Years of practice as a GP:                                                                            |                                         |                                                                                                                             |
| 11) How much do you currently work? <input type="checkbox"/> Part-time <input type="checkbox"/> Full-time |                                         |                                                                                                                             |
| 12) Approximately how many patients do you meet daily?                                                    |                                         |                                                                                                                             |
| 13) Health sector of practice (please tick all relevant options):                                         | Type of Sector                          | Location                                                                                                                    |
|                                                                                                           | <input type="checkbox"/> Public sector  | <input type="checkbox"/> Healthcare centre<br><input type="checkbox"/> Home visits                                          |
|                                                                                                           | <input type="checkbox"/> Solo practice  | <input type="checkbox"/> Private clinic<br><input type="checkbox"/> Pharmacy clinic<br><input type="checkbox"/> Home visits |
|                                                                                                           | <input type="checkbox"/> Group practice | <input type="checkbox"/> Private clinic<br><input type="checkbox"/> Pharmacy clinic<br><input type="checkbox"/> Home visits |
| <input type="checkbox"/> Company doctor                                                                   |                                         |                                                                                                                             |

|                                                                                                                                                                     |                                       |
|---------------------------------------------------------------------------------------------------------------------------------------------------------------------|---------------------------------------|
| 14) Areas within which you conduct home visits (if applicable):                                                                                                     |                                       |
| 15) Please write the addresses of your practice/s and tick your main clinic of practice: (N.B. If you work in a pharmacy, please include the name of that pharmacy) |                                       |
| Address                                                                                                                                                             | Main clinic of practice (please tick) |
|                                                                                                                                                                     | <input type="checkbox"/>              |

Thank you for your input!

<sup>1</sup> Being recognised as a fully competent specialist in family medicine, on the basis of acquired experience.

Figure S1. General practitioner (GP) demographics form

SUPPLEMENTARY FILES (2)

GP code: [for office use only]

Date of visit: \_\_\_\_\_

Time of visit: \_\_\_\_\_

Consultation provided:  at patient's home  at GP clinic  over-the-phone

**Patient form for respiratory tract complaints**

|                                                                                                                                                                                                                                                                                                                                                                                                                                                                                                                                                                                                                                                                                                                                                                                                                                                                                                                                                                                                                                                                                                                                                                                                                                                                                                                                                                                                                                                                                                                                                                                                                                                                                                                                                                                                                                                                                                                                                                                                                                                                                                                                                                                                                                                                                                                                                                                                                                                                                                                                                                                                                                                                                                                                                                                                                                                                          |                                                                                                                                                                                                                                                                                                                                                                                                                                                                                                                                                                                                                                                                                                                                                                                                                                                                                                                                                                                                                                                                                                                                                                                                                                                                                                                                                                                                                                                                                                                                                                                                                                                                                                                                                                                                                                                                                                                                                                                                                                                                                                                                                                                                                                                                                                                                                                                                                                                                                                                |              |  |  |  |                |          |      |  |       |  |  |  |
|--------------------------------------------------------------------------------------------------------------------------------------------------------------------------------------------------------------------------------------------------------------------------------------------------------------------------------------------------------------------------------------------------------------------------------------------------------------------------------------------------------------------------------------------------------------------------------------------------------------------------------------------------------------------------------------------------------------------------------------------------------------------------------------------------------------------------------------------------------------------------------------------------------------------------------------------------------------------------------------------------------------------------------------------------------------------------------------------------------------------------------------------------------------------------------------------------------------------------------------------------------------------------------------------------------------------------------------------------------------------------------------------------------------------------------------------------------------------------------------------------------------------------------------------------------------------------------------------------------------------------------------------------------------------------------------------------------------------------------------------------------------------------------------------------------------------------------------------------------------------------------------------------------------------------------------------------------------------------------------------------------------------------------------------------------------------------------------------------------------------------------------------------------------------------------------------------------------------------------------------------------------------------------------------------------------------------------------------------------------------------------------------------------------------------------------------------------------------------------------------------------------------------------------------------------------------------------------------------------------------------------------------------------------------------------------------------------------------------------------------------------------------------------------------------------------------------------------------------------------------------|----------------------------------------------------------------------------------------------------------------------------------------------------------------------------------------------------------------------------------------------------------------------------------------------------------------------------------------------------------------------------------------------------------------------------------------------------------------------------------------------------------------------------------------------------------------------------------------------------------------------------------------------------------------------------------------------------------------------------------------------------------------------------------------------------------------------------------------------------------------------------------------------------------------------------------------------------------------------------------------------------------------------------------------------------------------------------------------------------------------------------------------------------------------------------------------------------------------------------------------------------------------------------------------------------------------------------------------------------------------------------------------------------------------------------------------------------------------------------------------------------------------------------------------------------------------------------------------------------------------------------------------------------------------------------------------------------------------------------------------------------------------------------------------------------------------------------------------------------------------------------------------------------------------------------------------------------------------------------------------------------------------------------------------------------------------------------------------------------------------------------------------------------------------------------------------------------------------------------------------------------------------------------------------------------------------------------------------------------------------------------------------------------------------------------------------------------------------------------------------------------------------|--------------|--|--|--|----------------|----------|------|--|-------|--|--|--|
| <p><b>1. Patient demographics</b> <i>(please tick all items)</i></p> <p>Age _____ years</p> <p>Sex <input type="checkbox"/> male <input type="checkbox"/> female</p> <p>Current smoker <input type="checkbox"/> yes <input type="checkbox"/> no</p> <p>Other underlying co-morbidities/conditions (E.g. DM, COPD, CHF, immunodeficiency, etc.) <input type="checkbox"/> yes <input type="checkbox"/> no</p> <p><i>If yes:</i> _____</p> <p>Patient took antibiotics (past 2 weeks) <input type="checkbox"/> yes <input type="checkbox"/> no</p> <p><i>If yes (antibiotic taken for):</i> <input type="checkbox"/> same complaint <input type="checkbox"/> other complaint</p> <hr/> <p><b>2. Educational level</b> <i>(tick only 1 option – highest achieved)</i></p> <p><input type="checkbox"/> pre-school/kinder <input type="checkbox"/> primary <input type="checkbox"/> secondary <input type="checkbox"/> upper secondary <input type="checkbox"/> tertiary</p> <p><input type="checkbox"/> none of the above</p> <hr/> <p><b>3. Total number of people presently living in the household:</b> _____</p> <hr/> <p><b>4. Regular (daily/several times a week) contact with children &lt;5 years of age</b></p> <p><input type="checkbox"/> yes <input type="checkbox"/> no</p> <hr/> <p><b>5. Total number of symptomatic days</b> <i>(tick only 1 option)</i></p> <p><input type="checkbox"/> &lt;1 <input type="checkbox"/> 1-3 <input type="checkbox"/> 4-7 <input type="checkbox"/> 8-14 <input type="checkbox"/> &gt;14</p> <hr/> <p><b>6. Signs and symptoms</b> <i>(tick at least 1 option)</i></p> <p><input type="checkbox"/> fever (&gt;38.5°C) <input type="checkbox"/> productive cough <input type="checkbox"/> non-productive cough</p> <p><input type="checkbox"/> sore throat (no exudate) <input type="checkbox"/> rhinorrhoea <input type="checkbox"/> otalgia</p> <p><input type="checkbox"/> purulent otorrhoea <input type="checkbox"/> tonsillar exudate <input type="checkbox"/> odynophagia</p> <p><input type="checkbox"/> tender cervical nodes <input type="checkbox"/> hyperpnoea <input type="checkbox"/> dyspnoea</p> <p><input type="checkbox"/> sibilant rhonchi <input type="checkbox"/> purulent sputum</p> <p><input type="checkbox"/> other: _____</p> <p><input type="checkbox"/> none of the above</p> <hr/> <p><b>7. Diagnostic tests</b> <i>(tick at least 1 option)</i></p> <p>Rapid Strep A test <input type="checkbox"/> positive <input type="checkbox"/> negative</p> <p>CRP (mg/L) <input type="checkbox"/> &lt;10 <input type="checkbox"/> 10-24 <input type="checkbox"/> 25-49 <input type="checkbox"/> 50-99 <input type="checkbox"/> &gt;100</p> <p>Thoracic X-ray <input type="checkbox"/> positive <input type="checkbox"/> negative</p> <p>Other: _____</p> <p><input type="checkbox"/> none of the above</p> | <p><b>8. Aetiology</b> <i>(tick only 1 option)</i></p> <p><input type="checkbox"/> suspected viral infection <input type="checkbox"/> suspected bacterial infection</p> <p><input type="checkbox"/> suspected mixed aetiology</p> <hr/> <p><b>9. Primary clinical diagnosis</b> <i>(tick only 1 option)</i></p> <p><input type="checkbox"/> common cold <input type="checkbox"/> acute otitis media <input type="checkbox"/> acute sinusitis</p> <p><input type="checkbox"/> acute pharyngitis <input type="checkbox"/> acute tonsillitis <input type="checkbox"/> acute bronchitis</p> <p><input type="checkbox"/> pneumonia <input type="checkbox"/> influenza <input type="checkbox"/> allergy</p> <p><input type="checkbox"/> acute exacerbation of chronic bronchitis/COPD/ asthma</p> <p><input type="checkbox"/> suspected TB <input type="checkbox"/> other respiratory tract infection: _____</p> <hr/> <p><b>10. Antibiotic therapy</b> <i>(fill in accordingly)</i></p> <table border="1" style="width: 100%; border-collapse: collapse;"> <tr> <td style="width: 50%;">Generic name</td> <td colspan="3"></td> </tr> <tr> <td>Dose/Frequency</td> <td style="width: 20%;">Duration</td> <td colspan="2" style="width: 30%;">days</td> </tr> <tr> <td>Route</td> <td colspan="3"></td> </tr> </table> <p><input type="checkbox"/> delayed antibiotic prescription <input type="checkbox"/> no antibiotics prescribed</p> <hr/> <p><b>11. Symptomatic treatment</b> <i>(tick at least 1 option)</i></p> <p><input type="checkbox"/> analgesic <input type="checkbox"/> nasal spray <input type="checkbox"/> expectorant <input type="checkbox"/> antitussive</p> <p><input type="checkbox"/> decongestant <input type="checkbox"/> anti-pyretic <input type="checkbox"/> herbal remedy <input type="checkbox"/> corticosteroids</p> <p><input type="checkbox"/> anti-histamine <input type="checkbox"/> other: _____</p> <p><input type="checkbox"/> none of the above</p> <hr/> <p><b>12. Others</b> <i>(if applicable)</i></p> <p><input type="checkbox"/> allergy to penicillin</p> <p><input type="checkbox"/> referred to specialist/hospital</p> <p><input type="checkbox"/> patient/accompanying person asked for antibiotics</p> <p><input type="checkbox"/> sick leave certificate: _____ days</p> <p><input type="checkbox"/> patient is a regular client in my practice</p> <p><input type="checkbox"/> patient is not a Maltese resident</p> <p>Nationality <i>(if known):</i> _____</p> | Generic name |  |  |  | Dose/Frequency | Duration | days |  | Route |  |  |  |
| Generic name                                                                                                                                                                                                                                                                                                                                                                                                                                                                                                                                                                                                                                                                                                                                                                                                                                                                                                                                                                                                                                                                                                                                                                                                                                                                                                                                                                                                                                                                                                                                                                                                                                                                                                                                                                                                                                                                                                                                                                                                                                                                                                                                                                                                                                                                                                                                                                                                                                                                                                                                                                                                                                                                                                                                                                                                                                                             |                                                                                                                                                                                                                                                                                                                                                                                                                                                                                                                                                                                                                                                                                                                                                                                                                                                                                                                                                                                                                                                                                                                                                                                                                                                                                                                                                                                                                                                                                                                                                                                                                                                                                                                                                                                                                                                                                                                                                                                                                                                                                                                                                                                                                                                                                                                                                                                                                                                                                                                |              |  |  |  |                |          |      |  |       |  |  |  |
| Dose/Frequency                                                                                                                                                                                                                                                                                                                                                                                                                                                                                                                                                                                                                                                                                                                                                                                                                                                                                                                                                                                                                                                                                                                                                                                                                                                                                                                                                                                                                                                                                                                                                                                                                                                                                                                                                                                                                                                                                                                                                                                                                                                                                                                                                                                                                                                                                                                                                                                                                                                                                                                                                                                                                                                                                                                                                                                                                                                           | Duration                                                                                                                                                                                                                                                                                                                                                                                                                                                                                                                                                                                                                                                                                                                                                                                                                                                                                                                                                                                                                                                                                                                                                                                                                                                                                                                                                                                                                                                                                                                                                                                                                                                                                                                                                                                                                                                                                                                                                                                                                                                                                                                                                                                                                                                                                                                                                                                                                                                                                                       | days         |  |  |  |                |          |      |  |       |  |  |  |
| Route                                                                                                                                                                                                                                                                                                                                                                                                                                                                                                                                                                                                                                                                                                                                                                                                                                                                                                                                                                                                                                                                                                                                                                                                                                                                                                                                                                                                                                                                                                                                                                                                                                                                                                                                                                                                                                                                                                                                                                                                                                                                                                                                                                                                                                                                                                                                                                                                                                                                                                                                                                                                                                                                                                                                                                                                                                                                    |                                                                                                                                                                                                                                                                                                                                                                                                                                                                                                                                                                                                                                                                                                                                                                                                                                                                                                                                                                                                                                                                                                                                                                                                                                                                                                                                                                                                                                                                                                                                                                                                                                                                                                                                                                                                                                                                                                                                                                                                                                                                                                                                                                                                                                                                                                                                                                                                                                                                                                                |              |  |  |  |                |          |      |  |       |  |  |  |

**Figure S2.** Surveillance data collection form used to register cases with an acute respiratory tract complaint

## 1 SUPPLEMENTARY FILES (3)

2 **Table S1. General practitioner (GP) characteristics (n=33)**

|                                     |                            | <b>n</b> | <b>(%)</b> |
|-------------------------------------|----------------------------|----------|------------|
| <b>Sex</b>                          | male                       | 24       | (72.7)     |
|                                     | female                     | 9        | (27.3)     |
| <b>Age (years)</b>                  | 28-39                      | 7        | (21.2)     |
|                                     | 40-49                      | 9        | (27.3)     |
|                                     | 50-59                      | 14       | (42.4)     |
|                                     | ≥60                        | 3        | (9.1)      |
|                                     | <10                        | 6        | (18.7)     |
| <b>Years of GP practice (n=32)</b>  | 10-19                      | 5        | (15.6)     |
|                                     | 20-29                      | 14       | (43.8)     |
|                                     | ≥30                        | 7        | (21.9)     |
| <b>GP trainee</b>                   | no                         | 30       | (90.9)     |
|                                     | yes                        | 3        | (9.1)      |
| <b>Type of employment</b>           | part-time                  | 11       | (33.3)     |
|                                     | full-time                  | 22       | (66.7)     |
| <b>Practice location</b>            | public healthcentre clinic | 13       | (39.4)     |
|                                     | private clinic             | 14       | (42.4)     |
|                                     | private pharmacy clinic    | 11       | (33.3)     |
| <b>Type of practice<sup>†</sup></b> | group                      | 16       | (48.5)     |
|                                     | solo                       | 17       | (51.5)     |

NOTE. <sup>†</sup>GPs working in public sector healthcentres were defined as group practice practitioners

## 4 SUPPLEMENTARY FILES (4)

5 **Table S2. Sociodemographic and lifestyle characteristics of patients with**  
 6 **acute respiratory tract complaints**

|                                                        |                 | n     | (%)    |
|--------------------------------------------------------|-----------------|-------|--------|
| 7 <b>Sex (n=4,508)</b>                                 | male            | 2,113 | (46.9) |
|                                                        | female          | 2,395 | (53.1) |
| 17 <b>Age (years) (n=4,511)</b>                        | <5              | 544   | (12.1) |
|                                                        | 5-11            | 571   | (12.7) |
|                                                        | 12-17           | 357   | (7.9)  |
|                                                        | 18-24           | 467   | (10.3) |
|                                                        | 25-44           | 1,285 | (28.5) |
|                                                        | 45-64           | 790   | (17.5) |
| 24 <b>Educational level (n=4,484)</b>                  | ≥65             | 497   | (11.0) |
|                                                        | pre-school      | 496   | (11.1) |
|                                                        | primary         | 751   | (16.7) |
|                                                        | secondary       | 1,803 | (40.2) |
|                                                        | upper-secondary | 776   | (17.3) |
|                                                        | tertiary        | 545   | (12.2) |
| 29 <b>Household size (persons/household) (n=4,465)</b> | none achieved   | 113   | (2.5)  |
|                                                        | 1-2             | 1,087 | (24.3) |
|                                                        | 3-4             | 2,687 | (60.2) |
| 32 <b>Contact with children &lt;5 years (n=4,481)</b>  | ≥5              | 691   | (15.5) |
|                                                        | no              | 2,881 | (64.3) |
| 34 <b>Current smoker (n=4,453)</b>                     | yes             | 1,600 | (35.7) |
|                                                        | no              | 3,718 | (83.5) |
|                                                        | yes             | 735   | (16.5) |

STROBE Statement—Checklist of items that should be included in reports of *cross-sectional studies*

|                              | Item No | Recommendation                                                                                                                                                                                               | Page No |
|------------------------------|---------|--------------------------------------------------------------------------------------------------------------------------------------------------------------------------------------------------------------|---------|
| <b>Title and abstract</b>    | 1       | (a) Indicate the study's design with a commonly used term in the title or the abstract                                                                                                                       | 1       |
|                              |         | (b) Provide in the abstract an informative and balanced summary of what was done and what was found                                                                                                          | 2-3     |
| <b>Introduction</b>          |         |                                                                                                                                                                                                              |         |
| Background/rationale         | 2       | Explain the scientific background and rationale for the investigation being reported                                                                                                                         | 5-6     |
| Objectives                   | 3       | State specific objectives, including any prespecified hypotheses                                                                                                                                             | 6       |
| <b>Methods</b>               |         |                                                                                                                                                                                                              |         |
| Study design                 | 4       | Present key elements of study design early in the paper                                                                                                                                                      | 6-7     |
| Setting                      | 5       | Describe the setting, locations, and relevant dates, including periods of recruitment, exposure, follow-up, and data collection                                                                              | 6-7     |
| Participants                 | 6       | (a) Give the eligibility criteria, and the sources and methods of selection of participants                                                                                                                  | 7-8     |
| Variables                    | 7       | Clearly define all outcomes, exposures, predictors, potential confounders, and effect modifiers. Give diagnostic criteria, if applicable                                                                     | 8       |
| Data sources/<br>measurement | 8*      | For each variable of interest, give sources of data and details of methods of assessment (measurement). Describe comparability of assessment methods if there is more than one group                         |         |
| Bias                         | 9       | Describe any efforts to address potential sources of bias                                                                                                                                                    |         |
| Study size                   | 10      | Explain how the study size was arrived at                                                                                                                                                                    |         |
| Quantitative variables       | 11      | Explain how quantitative variables were handled in the analyses. If applicable, describe which groupings were chosen and why                                                                                 | 8       |
| Statistical methods          | 12      | (a) Describe all statistical methods, including those used to control for confounding                                                                                                                        | 8-9     |
|                              |         | (b) Describe any methods used to examine subgroups and interactions                                                                                                                                          |         |
|                              |         | (c) Explain how missing data were addressed                                                                                                                                                                  | 8       |
|                              |         | (d) If applicable, describe analytical methods taking account of sampling strategy                                                                                                                           |         |
|                              |         | (e) Describe any sensitivity analyses                                                                                                                                                                        |         |
| <b>Results</b>               |         |                                                                                                                                                                                                              |         |
| Participants                 | 13*     | (a) Report numbers of individuals at each stage of study—eg numbers potentially eligible, examined for eligibility, confirmed eligible, included in the study, completing follow-up, and analysed            | 9       |
|                              |         | (b) Give reasons for non-participation at each stage                                                                                                                                                         |         |
|                              |         | (c) Consider use of a flow diagram                                                                                                                                                                           |         |
| Descriptive data             | 14*     | (a) Give characteristics of study participants (eg demographic, clinical, social) and information on exposures and potential confounders                                                                     | 9       |
|                              |         | (b) Indicate number of participants with missing data for each variable of interest                                                                                                                          |         |
| Outcome data                 | 15*     | Report numbers of outcome events or summary measures                                                                                                                                                         | 9       |
| Main results                 | 16      | (a) Give unadjusted estimates and, if applicable, confounder-adjusted estimates and their precision (eg, 95% confidence interval). Make clear which confounders were adjusted for and why they were included | 25-27   |

|                          |    |                                                                                                                                                                            |       |
|--------------------------|----|----------------------------------------------------------------------------------------------------------------------------------------------------------------------------|-------|
|                          |    | (b) Report category boundaries when continuous variables were categorized                                                                                                  | 25-27 |
|                          |    | (c) If relevant, consider translating estimates of relative risk into absolute risk for a meaningful time period                                                           |       |
| Other analyses           | 17 | Report other analyses done—eg analyses of subgroups and interactions, and sensitivity analyses                                                                             |       |
| <b>Discussion</b>        |    |                                                                                                                                                                            |       |
| Key results              | 18 | Summarise key results with reference to study objectives                                                                                                                   | 10-11 |
| Limitations              | 19 | Discuss limitations of the study, taking into account sources of potential bias or imprecision. Discuss both direction and magnitude of any potential bias                 | 14-15 |
| Interpretation           | 20 | Give a cautious overall interpretation of results considering objectives, limitations, multiplicity of analyses, results from similar studies, and other relevant evidence | 11-14 |
| Generalisability         | 21 | Discuss the generalisability (external validity) of the study results                                                                                                      | 15-16 |
| <b>Other information</b> |    |                                                                                                                                                                            |       |
| Funding                  | 22 | Give the source of funding and the role of the funders for the present study and, if applicable, for the original study on which the present article is based              | 17    |

\*Give information separately for exposed and unexposed groups.

**Note:** An Explanation and Elaboration article discusses each checklist item and gives methodological background and published examples of transparent reporting. The STROBE checklist is best used in conjunction with this article (freely available on the Web sites of PLoS Medicine at <http://www.plosmedicine.org/>, Annals of Internal Medicine at <http://www.annals.org/>, and Epidemiology at <http://www.epidem.com/>). Information on the STROBE Initiative is available at [www.strobe-statement.org](http://www.strobe-statement.org).

# BMJ Open

## Factors associated with antibiotic prescribing in patients with acute respiratory tract complaints in Malta: a one-year repeated cross-sectional surveillance study

|                                 |                                                                                                                                                                                                                                                                                                                                                                                                                                                                                                                                                                                                                                                                                                                                                                                                                                           |
|---------------------------------|-------------------------------------------------------------------------------------------------------------------------------------------------------------------------------------------------------------------------------------------------------------------------------------------------------------------------------------------------------------------------------------------------------------------------------------------------------------------------------------------------------------------------------------------------------------------------------------------------------------------------------------------------------------------------------------------------------------------------------------------------------------------------------------------------------------------------------------------|
| Journal:                        | <i>BMJ Open</i>                                                                                                                                                                                                                                                                                                                                                                                                                                                                                                                                                                                                                                                                                                                                                                                                                           |
| Manuscript ID                   | bmjopen-2019-032704.R1                                                                                                                                                                                                                                                                                                                                                                                                                                                                                                                                                                                                                                                                                                                                                                                                                    |
| Article Type:                   | Original research                                                                                                                                                                                                                                                                                                                                                                                                                                                                                                                                                                                                                                                                                                                                                                                                                         |
| Date Submitted by the Author:   | 22-Oct-2019                                                                                                                                                                                                                                                                                                                                                                                                                                                                                                                                                                                                                                                                                                                                                                                                                               |
| Complete List of Authors:       | Saliba-Gustafsson, Erika; Karolinska Institutet, Department of Public Health Sciences, Global Health – Health Systems and Policy (HSP): Improving use of medicines<br>Dunberger Hampton, Alexandra; Karolinska Institutet, Department of Public Health Sciences, Global Health – Health Systems and Policy (HSP): Improving use of medicines<br>Zarb, Peter; Mater Dei Hospital, Department of Infection Prevention and Control<br>Orsini, Nicola; Karolinska Institutet, Department of Public Health Sciences, Social Medicine<br>Borg, Michael; Mater Dei Hospital, Department of Infection Prevention and Control; University of Malta, Faculty of Medicine and Surgery<br>Lundborg, Cecilia; Karolinska Institutet, Department of Public Health Sciences, Global Health – Health Systems and Policy (HSP): Improving use of medicines |
| <b>Primary Subject Heading</b>: | General practice / Family practice                                                                                                                                                                                                                                                                                                                                                                                                                                                                                                                                                                                                                                                                                                                                                                                                        |
| Secondary Subject Heading:      | Infectious diseases, Public health                                                                                                                                                                                                                                                                                                                                                                                                                                                                                                                                                                                                                                                                                                                                                                                                        |
| Keywords:                       | PRIMARY CARE, Respiratory infections < THORACIC MEDICINE, AUDIT, Antibiotic prescribing, General practitioners                                                                                                                                                                                                                                                                                                                                                                                                                                                                                                                                                                                                                                                                                                                            |
|                                 |                                                                                                                                                                                                                                                                                                                                                                                                                                                                                                                                                                                                                                                                                                                                                                                                                                           |

SCHOLARONE™  
Manuscripts

1  
2  
3 1 **TITLE PAGE**  
4  
5

6 2 **Factors associated with antibiotic prescribing in patients with acute respiratory tract**  
7  
8 3 **complaints in Malta: a one-year repeated cross-sectional surveillance study**  
9

10 4 Erika A Saliba-Gustafsson<sup>1\*</sup>, Alexandra Dunberger Hampton<sup>1</sup>, Peter Zarb<sup>2</sup>, Nicola Orsini<sup>3</sup>,  
11  
12 5 Michael A Borg<sup>2,4</sup>, Cecilia Stålsby Lundborg<sup>1</sup>  
13  
14  
15

16 6 <sup>1</sup> Department of Public Health Sciences, Global Health – Health Systems and Policy (HSP):  
17  
18 7 Improving use of medicines, Karolinska Institutet, Tomtebodavägen 18A, 171 77 Stockholm,  
19  
20 8 Sweden  
21  
22

23 9 <sup>2</sup> Department of Infection Prevention and Control, Mater Dei Hospital, Msida MSD 2090,  
24  
25 10 Malta  
26  
27

28 11 <sup>3</sup> Department of Public Health Sciences, Social Medicine, Karolinska Institutet, Solnavägen  
29  
30 12 1E, 113 65 Stockholm, Sweden  
31  
32

33 13 <sup>4</sup> Faculty of Medicine and Surgery, University of Malta, Msida MSD 2080, Malta  
34

35 14 \* corresponding author  
36  
37

38 15 **Correspondence:** Erika A Saliba-Gustafsson, Karolinska Institutet, Department of Public  
39  
40 16 Health Sciences, Tomtebodavägen 18A, 171 77 Stockholm, Sweden. E-mail:  
41  
42 17 erika.saliba@gmail.com. Tel: +46 (0) 72 522 4460  
43  
44

45 18 **Running title:** Factors associated with antibiotic prescribing in patients with acute  
46  
47 19 respiratory tract complaints in Malta  
48  
49  
50  
51  
52  
53  
54  
55  
56  
57  
58  
59  
60

## 20 **STRUCTURED ABSTRACT**

21 **Objective:** To identify factors that influence general practitioners' (GPs') oral antibiotic  
22 prescribing for acute respiratory tract complaints (aRTCs) in Malta.

23 **Design:** Repeated, cross-sectional surveillance.

24 **Setting:** Maltese general practice; both public healthcentres and private GP clinics.

25 **Participants:** 30 GPs registered on the Malta Medical Council's Specialist Register and 3 GP  
26 trainees registered data of 4831 patients of all ages suffering from any aRTC. Data were  
27 collected monthly between May 2015 and April 2016 during predetermined one-week  
28 periods.

29 **Outcome measures:** The outcome of interest was antibiotic prescription (yes/no), defined as  
30 an oral antibiotic prescription issued for an aRTC during an in-person consultation,  
31 irrespective of the number of antibiotics given. The association between GP-, practice- and  
32 consultation-level factors, patient sociodemographic factors and patient health status factors,  
33 and antibiotic prescription was investigated.

34 **Results:** The antibiotic prescription rate was 45%. Independent factors positively associated  
35 with antibiotic prescribing included female GP sex (OR=2.3, 95% CI 1.22-4.26), GP age with  
36 GPs  $\geq 60$  being the most likely (OR=34.7, 95% CI 14.14-84.98), patient age with patients  $\geq 65$   
37 being the most likely (OR=2.3, 95% CI 1.71-3.18), number of signs and/or symptoms with  
38 patients having  $\geq 4$  being the most likely (OR=9.6, 95% CI 5.78-15.99), fever (OR=2.6, 95%  
39 CI 2.08-3.26), productive cough (OR=1.3, 95% CI 1.03-1.61), otalgia (OR=1.3, 95% CI 1.01-  
40 1.76), tender cervical nodes (OR=2.2, 95% CI 1.57-3.05), regular clients (OR=1.3, 95% CI  
41 1.05-1.66), antibiotic requests (OR=4.8, 95% CI 2.52-8.99) and smoking (OR=1.4, 95% CI  
42 1.13-1.71). Conversely patients with non-productive cough (OR=0.3, 95% CI 0.26-0.41), sore

1  
2  
3 43 throat (OR=0.6, 95% CI 0.53-0.78), rhinorrhoea (OR=0.3, 95% CI 0.23-0.36) or dyspnoea  
4  
5 44 (OR=0.6, 95% CI 0.41-0.83), were less likely to receive an antibiotic prescription.  
6  
7

8 45 **Conclusion:** Antibiotic prescribing for aRTCs was high and influenced by a number of  
9  
10 46 factors. Potentially inappropriate prescribing in primary care can be addressed through multi-  
11  
12 47 faceted interventions addressing modifiable factors associated with prescription.  
13  
14

15 48 **Trial registration number:** NCT03218930  
16

17  
18 49 **Key words:** Primary care, respiratory infections, audit, antibiotic prescribing, general  
19  
20 50 practitioners  
21  
22  
23  
24  
25  
26  
27  
28  
29  
30  
31  
32  
33  
34  
35  
36  
37  
38  
39  
40  
41  
42  
43  
44  
45  
46  
47  
48  
49  
50  
51  
52  
53  
54  
55  
56  
57  
58  
59  
60

## 51 STRENGTHS AND LIMITATIONS

- 52 • This is the first study in Malta which looks at factors influencing antibiotic prescribing  
53 using repeated cross-sectional surveillance data.
- 54 • The simple to complete surveillance forms were intended to aid documentation of as  
55 many aRTC cases as possible, while reducing GP dropouts and non-reporting. Given  
56 its design and incorporation into clinical practice, it may have helped to reduce the  
57 effect of observation bias.
- 58 • GP participation was voluntarily therefore it is possible that the GP sample consists of  
59 GPs who were more interested in the research area or more conservative prescribers  
60 than non-participating GPs, affecting the study's representativeness.
- 61 • The audit-based nature of the study may have resulted in measurement error; GPs may  
62 have completed patient background information themselves without directly asking  
63 the patient and variables located at the end of the surveillance sheet that were left  
64 unmarked may have been inaccurately assumed to be non-cases.
- 65 • Since GPs were issued three-monthly feedback reports, a behaviour change  
66 intervention itself, their antibiotic prescribing rate may have been affected as a result.

## 67 INTRODUCTION

68 Since their discovery antibiotics have saved lives and reduced suffering however their  
69 considerable overuse and misuse has, in part, led to the development of antibiotic resistance,  
70 threatening their effectiveness globally. Unchecked, antibiotic resistance can halt and  
71 potentially reverse decades of medical progress, with severe repercussions on patient  
72 outcomes and healthcare expenditure both on an individual and societal level.<sup>1</sup> Antibiotics do  
73 not only target pathogenic bacteria; their use has long-lasting effects on gut flora and has been  
74 shown to be associated with allergy development and metabolic syndromes for example,  
75 particularly when prescribed during infancy.<sup>2</sup>

76 In Europe, a positive correlation between antibiotic use and resistance has been shown.<sup>3</sup> Most  
77 antibiotic prescriptions are provided in outpatient care, with respiratory tract infections being  
78 the most common diagnoses.<sup>3</sup> Studies have shown that up to 78% of patients are prescribed  
79 antibiotics for respiratory tract infections in primary care, even though an estimated 90% are  
80 viral in aetiology and thus antibiotics are seldom required.<sup>4-8</sup> Indeed, unless pneumonia is  
81 suspected, the effect of antibiotic treatment is moderate at best indicating that many antibiotic  
82 prescriptions are provided unnecessarily and without any overall patient benefit.<sup>9</sup>  
83 Consequently, a key strategy to contain antibiotic resistance is to improve antibiotic use in  
84 primary care, particularly among general practitioners (GPs).

85 While primary care guidelines often recommend limited antibiotic use in the treatment of  
86 respiratory tract infections, substantial variation exists in practical case management across  
87 countries and the evidence of over-prescribing is abundant.<sup>7,10,11</sup> The decision to prescribe an  
88 antibiotic is complex and influenced by a host of interconnected factors including, but not  
89 limited to, provider attitudes and characteristics, patient age, comorbidities, signs and  
90 symptoms, expectations, environmental and cultural factors.<sup>10,12-15</sup> Further cloaked by

1  
2  
3 91 diagnostic uncertainty, GPs risk misdiagnosing and misclassifying the aetiology of respiratory  
4  
5 92 tract infections, and may prescribe antibiotics to be on the safe side.  
6  
7  
8 93 In the latest Special Eurobarometer surveys on antibiotic resistance held in 2013 and 2016,  
9  
10 94 Malta reported the highest antibiotic consumption in Europe with 48% of Maltese respondents  
11  
12 95 reporting taking at least one antibiotic course in a calendar year.<sup>16,17</sup> Non-prescribed use was  
13  
14 96 minimal at <4%.<sup>16,17</sup> Our recently published descriptive study based on surveillance data  
15  
16  
17 97 showed that, in 2015/16, 46% of patients with acute respiratory tract complaints (aRTCs)  
18  
19 98 were prescribed antibiotics by their GP.<sup>5</sup> The majority of antibiotic consumption in Malta  
20  
21 99 does indeed occur in the community and comprises primarily broad-spectrum antibiotics (i.e.  
22  
23  
24 100 tetracyclines, beta-lactam antibacterials, second- and third- generation cephalosporins,  
25  
26 101 macrolides and fluoroquinolones).<sup>5,18,19</sup>  
27  
28 102 Nation-wide data on antibiotic prescribing in Maltese primary care is lacking and Malta has  
29  
30 103 only been able to provide ESAC-Net with wholesale distributor data to estimate community  
31  
32 104 antibiotic use. As a result, it has not been possible to run in-depth analysis to elucidate factors  
33  
34 105 which impact antibiotic prescribing. Recognising the need to identify and understand the  
35  
36  
37 106 drivers of antibiotic prescribing in primary care to develop targeted antibiotic stewardship  
38  
39 107 activities and improve their chance of success, we decided to carry a more in-depth analysis  
40  
41  
42 108 of our 2015/16 surveillance data. Therefore this study aimed to identify factors that influence  
43  
44 109 GPs' oral antibiotic prescribing practices for aRTCs in Malta.  
45  
46  
47

## 48 110 **METHODS**

### 49 50 51 111 **Study design, setting and participants**

52  
53 112 This cross-sectional surveillance study provided baseline data for the Maltese Antibiotic  
54  
55 113 Stewardship Programme in the Community (MASPIC) project, a quasiexperimental social  
56  
57 114 marketing intervention aiming to reduce inappropriate antibiotic prescribing in Maltese  
58  
59 115 primary care. A study protocol with a detailed description of the study setting and design has  
60

1  
2  
3 116 been published.<sup>20</sup> An in-depth description of GPs' antibiotic prescribing patterns at baseline,  
4  
5 117 using the same surveillance data but with slightly different eligibility criteria, has already  
6  
7 118 been presented elsewhere.<sup>5</sup>  
8  
9

10 119 In brief, this study was carried out in public and private general practices in Malta. A total of  
11  
12 120 370 GPs registered on the Malta Medical Council's Specialist Register and 34 GP trainees  
13  
14 121 were invited to the study. Seventy registered GPs and GP trainees responded, of which 35  
15  
16 122 agreed to participate. Prior to surveillance initiation, two GPs stopped working clinically;  
17  
18 123 therefore, ultimately 30 GPs and three GP trainees participated.  
19  
20

#### 21 124 **Patient and public involvement**

22  
23 125 This study was conducted without patient or public involvement. Patients were not invited to  
24  
25 126 comment on the study design and were not consulted to develop patient relevant outcomes or  
26  
27 127 interpret results. Patients were neither requested to contribute to the writing or editing of this  
28  
29 128 document for readability or accuracy.  
30  
31

#### 32 129 **Data collection**

33  
34 130 During enrolment, GPs were asked to complete a background information sheet which  
35  
36 131 included information on demographics, training/experience and service delivery organisation  
37  
38 132 (Figure S1). GPs registered patients seen for aRTCs during 12 predetermined surveillance  
39  
40 133 weeks (1 week/month without substitutions) between May 2015 and April 2016. Forms were  
41  
42 134 completed by the GPs themselves during first consultations with patients of all ages suffering  
43  
44 135 from any aRTC (defined as lower and upper respiratory tract infections, allergies and  
45  
46 136 exacerbation of COPD/asthma/bronchitis), and included information on patient and clinical  
47  
48 137 factors, clinical assessment, diagnosis and prescribed medicines. The surveillance data  
49  
50 138 collection form has been published elsewhere.<sup>5</sup> Data on the total number of patients seen each  
51  
52 139 day, regardless of complaint, were also collected.  
53  
54  
55  
56  
57  
58  
59  
60

1  
2  
3 140 Communication was maintained with GPs throughout surveillance. Each surveillance week,  
4  
5 141 GPs received three text messages, one to remind them to prepare for data collection, another  
6  
7 142 to initiate it and a third to conclude it. GPs were also contacted by phone at most four times  
8  
9 143 during the year, to provide encouragement and address queries. Moreover, GPs received  
10  
11 144 three-monthly individual- and aggregate-level feedback reports on their prescribing patterns.  
12  
13

#### 14 145 **Eligibility criteria**

16 146 Only cases diagnosed with an aRTC were included in this study. Cases were only considered  
17  
18 147 for analysis if they were consulting with the participating GP for the first time for that  
19  
20 148 presenting complaint. Any follow-up visits recorded were automatically excluded. For the  
21  
22 149 purpose of this analysis, all cases diagnosed with pneumonia were excluded from the dataset.  
23  
24 150 Cases where more than one aetiology and/or diagnosis was provided or who were consulted  
25  
26 151 over the phone, were also excluded from analysis. As a result 313 aRTC cases were excluded  
27  
28 152 from analysis following data cleaning, reducing our final sample size to 4518.  
29  
30  
31  
32

#### 33 153 **Statistical analysis**

35 154 Data were analysed using Microsoft® Excel 2010 and Stata/IC® 13.1. Surveillance items not  
36  
37 155 marked were assumed not present and analysed as absent. Analyses were conducted using  
38  
39 156 complete case analysis. Descriptive statistics were calculated using frequencies and  
40  
41 157 percentages, means and SDs, medians and IQRs as appropriate. The outcome of interest was  
42  
43 158 antibiotic prescription (yes/no), defined as an oral antibiotic prescription issued for an aRTC  
44  
45 159 during an in-person consultation, irrespective of the number of antibiotics given. It included  
46  
47 160 both regular and delayed prescriptions, the latter to be dispensed if symptoms persisted,  
48  
49 161 typically after 48 to 72 hours. It did not include 'delayed instruction', i.e. directions to follow-  
50  
51 162 up for a prescription if symptoms persisted or worsened.  
52  
53  
54  
55 163 To control for clustering at the GP level, potential predictors of antibiotic prescription were  
56  
57 164 assessed using population averaged models using generalised estimating equations (GEE).  
58  
59  
60

1  
2  
3 165 Frequency distributions of individual explanatory variables of interest were calculated and  
4  
5 166 univariable associations between each variable and antibiotic prescription were subsequently  
6  
7 167 assessed using unadjusted ORs and 95% CIs. Since we could not assume linearity to the  
8  
9 168 outcome, all continuous variables were categorised. Individual signs and symptoms variables  
10  
11 169 were only investigated if at least 5% of aRTC cases presented with that particular symptom.  
12  
13 170 Multivariate Wald-type tests were performed on multi-level categorical variables to test the  
14  
15 171 hypothesis of the overall association.  
16  
17 172 Potential predictors were included in the multivariable model if significant at  $p < 0.2$  at  
18  
19 173 univariable level and excluded if there were issues with collinearity. A predictor was only  
20  
21 174 kept in the multivariable model if it improved the model and its  $p$ -value was less than 0.05.  
22  
23 175 Ultimately 4425 aRTC cases were included in the final multivariable model.  
24  
25  
26  
27  
28

## 29 176 **RESULTS**

30  
31  
32 177 In this cohort of aRTC patients, 2034 (45.0%) received an antibiotic prescription, of which  
33  
34 178 333 (16.4%) were delayed.  
35  
36

### 37 179 **GP characteristics**

38  
39 180 Most GPs were male ( $n=24$ ; 73%). Mean age (years) was  $49 \pm 12$  and mean years of GP  
40  
41 181 practice was  $23 \pm 11$ . Eleven (33%) GPs worked exclusively in the public sector whilst 20  
42  
43 182 (61%) worked in the private sector (including private pharmacy clinics). Two (6%) worked in  
44  
45 183 both sectors. Table S1 summarises the GP characteristics.  
46  
47  
48

### 49 184 **Patient characteristics**

50  
51 185 Just over half of patients were female ( $n=2395$ ; 53.1%) and the median age was 29 years  
52  
53 186 (IQR=12-48). Over a third had completed up to secondary school education ( $n=3050$ ; 68.0%).  
54  
55 187 Smoking was reported in 735 (16.5%) cases. A summary of the patients' sociodemographic  
56  
57 188 and lifestyle characteristics is presented in Table S2.  
58  
59

### 60 189 **Factors associated with antibiotic prescribing**

1  
2  
3 190 The univariable and multivariable associations between GP-, practice- and consultation-level  
4  
5 191 factors (Table 1), patient sociodemographic factors (Table 2), clinical factors (Table 3), and  
6  
7 192 antibiotic prescription are described below.

9  
10 193 Univariable analysis revealed numerous factors associated with antibiotic prescribing. At GP-  
11  
12 194 level, GP age was identified as an important predictor with GPs aged 60 and older being most  
13  
14 195 likely to prescribe antibiotics. At consultation-level, regular clients and patients who asked for  
15  
16 196 antibiotics were more likely to receive an antibiotic prescription. Patient sociodemographic  
17  
18 197 factors associated with antibiotic prescription included female sex, patient age (particularly  
19  
20 198 those aged 65 and older) and being a smoker. Finally, a number of patient health status factors  
21  
22 199 were significantly associated with antibiotic prescription at univariable level, with the most  
23  
24 200 important being fever  $>38.5^{\circ}\text{C}$ , tender cervical nodes and total number of signs and/or  
25  
26 201 symptoms with the odds of prescription increasing as the number increased.

27  
28  
29  
30 202 In the final multivariable model, female GPs were 2.3 times more likely to prescribe  
31  
32 203 antibiotics (95% CI 1.22-4.26) and, compared to younger GPs aged between 28 and 39 years,  
33  
34 204 GPs aged 50 to 59 (OR=2.1, 95% CI 1.19-3.77) or 60 years and older (OR=34.7, 95% CI  
35  
36 205 14.14-84.98) were more likely to prescribe antibiotics. Increasing patient age also increased  
37  
38 206 the likelihood of receiving an antibiotic prescription, with patients aged 65 and older being the  
39  
40 207 most likely to receive a prescription (OR=2.3, 95% CI 1.71-3.18). The more signs and/or  
41  
42 208 symptoms a patient presented with, the more likely they were to be given an antibiotic, with  
43  
44 209 patients having four or more signs and/or symptoms being the most likely (OR=9.6, 95% CI  
45  
46 210 5.78-15.99). Additionally, patients with fever  $>38.5^{\circ}\text{C}$  (OR=2.6, 95% CI 2.08-3.26),  
47  
48 211 productive cough (OR=1.3, 95% CI 1.03-1.61), otalgia (OR=1.3, 95% CI 1.01-1.76), tender  
49  
50 212 cervical nodes (OR=2.2, 95% CI 1.57-3.05), regular clients (OR=1.3, 95% CI 1.05-1.66),  
51  
52 213 patients who requested antibiotics (OR=4.8, 95% CI 2.52-8.99) and smokers (OR=1.4, 95%  
53  
54 214 CI 1.13-1.71), were also more likely to be prescribed an antibiotic. Conversely, patients with  
55  
56  
57  
58  
59  
60

1  
2  
3 215 non-productive cough (OR=0.3, 95% CI 0.26-0.41), sore throat (OR=0.6, 95% CI 0.53-0.78),  
4  
5 216 rhinorrhoea (OR=0.3, 95% CI 0.23-0.36) or dyspnoea (OR=0.6, 95% CI 0.41-0.83), were less  
6  
7 217 likely to be given an antibiotic prescription.  
8  
9

## 10 218 **DISCUSSION**

11  
12  
13  
14 219 This is the first study in Malta that identifies factors associated with antibiotic prescribing for  
15  
16 220 aRTCs in the community, using surveillance data. While univariable analysis revealed  
17  
18 221 numerous factors associated with antibiotic treatment, multivariable analysis identified  
19  
20 222 several independent predictors of antibiotic prescription at different levels – provider, patient,  
21  
22 223 consultation and clinical.  
23  
24

25  
26 224 Our results pertaining to GP factors both converge and diverge from prior research. It has  
27  
28 225 been suggested that high consultation rates may result in higher antibiotic prescription and in  
29  
30 226 fact a Norwegian study was able to confirm this association.<sup>21</sup> In our study however, despite  
31  
32 227 GPs experiencing rather high daily patient loads, this did not influence their antibiotic  
33  
34 228 prescription.  
35  
36

37  
38 229 Similar to Akkerman et al.,<sup>22</sup> more years of GP experience was associated with increased  
39  
40 230 antibiotic treatment. In contrast, an Italian study concluded the opposite, although the  
41  
42 231 antibiotic prescribing of both GPs and paediatricians in children was investigated.<sup>23</sup> Although  
43  
44 232 we did not investigate years of GP practice specifically due to collinearity issues, we found a  
45  
46 233 positive association between GP age and antibiotic prescription, which reflects the GPs' years  
47  
48 234 of practice. In Malta, family medicine was recognised as a specialty in 2004, after which  
49  
50 235 doctors were legally required to undergo specialist training in family medicine. Through the  
51  
52 236 'grandfather clause', doctors who started training in Malta before November 2003 were  
53  
54 237 eligible to acquire specialisation under certain criteria, essentially exempting them from  
55  
56 238 specialist training.<sup>24</sup> Lower antibiotic prescribing among younger GPs could be explained by  
57  
58  
59  
60

1  
2  
3 239 the fact that they have more recently undergone specialist training. Older GPs may engage in  
4  
5 240 more habitual behaviour and be in greater need of refresher courses and information on the  
6  
7  
8 241 latest antibiotic prescription guidelines.  
9

10 242 Although it is well established that male and female physicians engage in different interaction  
11  
12 243 and communication styles with patients,<sup>25</sup> few studies have investigated the association  
13  
14 244 between GP sex and antibiotic prescribing. Two recent studies investigating antibiotic  
15  
16 245 prescription for aRTCs specifically, found that female GPs prescribe fewer antibiotics<sup>26</sup>  
17  
18 246 particularly to female patients,<sup>27</sup> although the results were not statistically significant.  
19  
20 247 Conversely, our findings revealed that female GPs in Malta are more likely to prescribe  
21  
22 248 antibiotics. Although our sample is representative of the population for sex, we believe that  
23  
24 249 further research is needed to explore and better explain this association.  
25  
26  
27  
28

29 250 In our study, antibiotic treatment increased significantly with age, with the elderly ( $\geq 65$  years)  
30  
31 251 most likely to receive a prescription. The age-range of patients included in similar studies  
32  
33 252 varies widely, with most only looking at patient subsets, making it difficult to compare  
34  
35 253 findings on age. While we share similar results as studies carried out in Holland and  
36  
37 254 Australia,<sup>28,29</sup> in England/Wales and Sweden, high rates of antibiotic treatment were found  
38  
39 255 among the elderly and children alike.<sup>30,31</sup> In contrast, in Norway it was found that patients  
40  
41 256 aged 80 and over actually had the lowest odds of receiving an antibiotic prescription, followed  
42  
43 257 by children younger than 6 years.<sup>21</sup> Given that young children are more likely to visit their  
44  
45 258 paediatrician in Malta, it is possible that more severe cases were missed in this study and that  
46  
47  
48  
49 259 the youngest age groups are underrepresented. The higher prescription rates among the elderly  
50  
51 260 in Malta could suggest an augmented concern for their vulnerability towards severe  
52  
53 261 infections, and an understanding that aRTCs in children are likely viral in origin.  
54  
55

56  
57 262 Similar to other studies,<sup>32-34</sup> being a current smoker was identified as an independent  
58  
59 263 predictor of antibiotic prescribing. Doctors may feel that smokers will deteriorate without  
60

1  
2  
3 264 antibiotics, however there is no evidence that antibiotics provide smokers greater clinical  
4  
5 265 benefit or faster recovery.<sup>33</sup> Fever, productive cough, otalgia or tender cervical nodes were  
6  
7 266 also found to be independent predictors of antibiotic prescribing. Conversely, presenting with  
8  
9  
10 267 a sore throat, non-productive cough, rhinorrhoea or dyspnoea led to a decreased likelihood of  
11  
12 268 prescription. Fever is frequently reported as a significant predictor of antibiotic  
13  
14 269 prescription.<sup>34-36</sup> An Italian study investigating antibiotic prescription in young children,  
15  
16  
17 270 similarly found that otalgia, cervical adenopathy or absence of rhinorrhoea among others were  
18  
19 271 associated with antibiotic prescription.<sup>36</sup> GPs could believe that certain clinical findings, that  
20  
21 272 are often positively associated to prescription, indicate a bacterial infection or are a precursor  
22  
23  
24 273 for more serious illness.

25  
26 274 Differentiating between bacterial and viral aetiologies based on signs and/or symptoms alone  
27  
28 275 is challenging and a likely driver of antibiotic over-prescription. Although some symptoms  
29  
30 276 suggest a possible bacterial infection and could warrant further investigation, most  
31  
32  
33 277 uncomplicated viral respiratory tract infections last between 5 and 7 days and peak in severity  
34  
35 278 at days 3 to 6.<sup>37</sup> Given that most patients in this study presented within three symptomatic  
36  
37  
38 279 days, some may have benefitted from a wait and see approach or delayed prescription,  
39  
40 280 without negative consequences. In fact, a study which examined antibiotic prescribing for  
41  
42 281 acute cough and its impact on recovery across 13 European countries found similar recovery  
43  
44 282 rates in patients prescribed and not prescribed antibiotics.<sup>38</sup> The potential role individual  
45  
46  
47 283 symptoms play in inappropriate antibiotic use should not be overlooked, as an EU-study  
48  
49 284 indicated that Maltese respondents take antibiotics primarily to treat symptoms as opposed to  
50  
51 285 illnesses.<sup>17</sup>

52  
53  
54 286 Being a regular client also contributed to increased likelihood of antibiotic prescribing in this  
55  
56 287 study. Given the structure of primary healthcare in Malta, private sector GPs, who  
57  
58  
59 288 simultaneously compete for business and whose patients pay out-of-pocket, may be eager to  
60

1  
2  
3 289 please. In fact, research suggests that a trade-off may exist between prudent antibiotic use and  
4  
5 290 cultivating a positive doctor-patient relationship.<sup>39</sup> This is also impacted by expectations and  
6  
7 291 studies have shown that both doctors' belief that a patient expects antibiotics, and patients'  
8  
9 292 actual expectations for antibiotics are associated with antibiotic prescription.<sup>40-42</sup> Requesting  
10  
11 293 antibiotics was an important predictor of antibiotic prescription in our study. Whilst some  
12  
13 294 studies have shown that providing an antibiotic prescription to such patients increased patient  
14  
15 295 satisfaction,<sup>39,40</sup> others suggest that it does not, indicating instead that receiving information  
16  
17 296 when an antibiotic is expected but not needed is as important as receiving a prescription.<sup>43</sup>  
18  
19 297 Whilst it is imperative to understand why patients expect antibiotics and what determines  
20  
21 298 patient satisfaction in Malta, GPs need to find alternative strategies to ensure patient  
22  
23 299 satisfaction without providing an unwarranted antibiotic prescription. One strategy is  
24  
25 300 enhancing doctor-patient communication through communication skills training. Effective  
26  
27 301 communication together with information tools could facilitate decision-making and empower  
28  
29 302 doctors to decline antibiotic requests when unnecessary.<sup>44</sup> This is important, as receiving an  
30  
31 303 antibiotic, particularly when expected, reinforces patients' desire for prescriptions and their  
32  
33 304 perception that they should consult a GP for a similar problem in the future.<sup>45</sup>  
34  
35  
36  
37  
38  
39  
40 305 A study carried out in Spain also showed that having access to point-of-care tests (rapid  
41  
42 306 antigen detection tests and C-reactive protein) was associated with an 18.9% lower antibiotic  
43  
44 307 prescription rate among antibiotic-requesting patients.<sup>46</sup> Having access to rapid tests could  
45  
46 308 help GPs support their decision not to prescribe by reducing uncertainty thereby lessening the  
47  
48 309 risk that they give in to patient demand, whilst providing reassurance to patients.<sup>46,47</sup> In Malta,  
49  
50 310 point-of-care tests are largely unavailable, which may augment diagnostic uncertainty.  
51  
52 311 Coupled with patient demand for antibiotics, this exerts prescribing pressure on GPs and may  
53  
54 312 result in an unnecessary prescription. Malta possesses a culture that scores high for  
55  
56 313 uncertainty avoidance, a cultural dimension that has consistently been reported as a potent  
57  
58  
59  
60

1  
2  
3 314 driver for unnecessary antibiotic use.<sup>14,15,48</sup> Efforts should be made to make low-cost, rapid  
4  
5 315 diagnostics more readily available since these could reduce diagnostic uncertainty and lessen  
6  
7 316 the pressure to prescribe an empiric antibiotic. However, their introduction must be  
8  
9  
10 317 approached with caution to avoid introducing new elements of uncertainty, addressing system  
11  
12 318 factors such as the out-of-pocket cost of tests on the overall consultation, combined with  
13  
14 319 training and support to encourage acceptance. Likewise, patients should be informed about  
15  
16  
17 320 the possibility of low-cost testing to avoid unnecessary antibiotic consumption, thereby  
18  
19 321 safeguarding themselves and their future.

### 21 322 **Strengths and limitations**

23  
24 323 Knowledge on the drivers of antibiotic prescribing in southern European countries with high  
25  
26 324 antibiotic consumption rates is largely lacking, limiting our ability to develop targeted  
27  
28 325 interventions. A first of its kind in Malta, this study paves the way for more research on  
29  
30 326 antibiotic prescribing for aRTCs and other indications in the outpatient sector. The sample of  
31  
32  
33 327 4518 aRTC cases was sufficient to analyse a large number of potential explanatory variables  
34  
35 328 in multivariable analysis. Data collection tools were adapted from materials used in previous  
36  
37 329 research<sup>49,50</sup> and piloted in the Maltese context. Through user-friendly surveillance forms, we  
38  
39  
40 330 acquired data on provider, patient, consultation and clinical factors which could impact  
41  
42 331 antibiotic prescribing, allowing for deeper analysis of potential influencing factors compared  
43  
44 332 to studies that only examine a subset of these characteristics. The simple to complete forms  
45  
46  
47 333 were intended to aid documentation of as many aRTC cases as possible, while reducing GP  
48  
49 334 dropouts and non-reporting. Given its design and incorporation into clinical practice, it may  
50  
51 335 have helped reduce the effect of observation bias.<sup>10</sup>

52  
53  
54 336 Still, this study does have limitations. Since GPs participated voluntarily, it is possible that  
55  
56 337 participants were more interested in the research area or more conservative prescribers than  
57  
58 338 non-participating GPs. Therefore our GP sample may not be representative of all Maltese  
59  
60

1  
2  
3 339 GPs. The audit-based nature of the study may have resulted in measurement error; it is  
4  
5 340 possible that GPs completed patient background information that was atypical to ask during a  
6  
7 341 normal consultation without directly asking the patient. It is also possible that variables of  
8  
9 342 interest located at the end of the surveillance sheet were left unmarked and inaccurately  
10  
11 343 assumed to be non-cases. Lastly, GPs were issued three-monthly feedback reports and since  
12  
13 344 audit and feedback is a behaviour change intervention in itself it is possible that the antibiotic  
14  
15 345 prescribing rate has been affected as a result of it. However, prior research on the association  
16  
17 346 between surveillance participation and GPs' antibiotic prescription patterns has produced  
18  
19 347 mixed results; a recent randomised control trial reported no effect.<sup>51</sup>  
20  
21  
22  
23

## 24 348 **CONCLUSION AND IMPLICATIONS FOR RESEARCH AND POLICY**

25  
26  
27  
28 349 Our study sheds light on key drivers of community-level antibiotic prescribing for aRTCs in  
29  
30 350 Malta, providing missing scientific evidence necessary to develop tailored interventions  
31  
32 351 aimed at improving prudent antibiotic use. Furthermore, we believe that our study could help  
33  
34 352 guide antimicrobial stewardship initiatives in the community in countries with similar  
35  
36 353 sociocultural traits.

37  
38  
39 354 Addressing inappropriate antibiotic prescribing in primary care requires multifaceted  
40  
41 355 interventions that focus on educating providers and patients alike, whilst providing them with  
42  
43 356 the tools required to ensure that antibiotics are prescribed appropriately and taken only when  
44  
45 357 necessary. Although more experienced GPs could benefit from targeted antibiotic stewardship  
46  
47 358 activities, ongoing continuing medical education initiatives for all GPs are important to ensure  
48  
49 359 that appropriate antibiotic prescription practices are maintained. Communication training in  
50  
51 360 particular is needed to facilitate decision-making and empower doctors to decline antibiotic  
52  
53 361 requests. National antibiotic guidelines should include other diagnostic criteria such as  
54  
55 362 smoking status and better promote the use of delayed antibiotic prescription, particularly in  
56  
57 363 high-prescription contexts. Finally, in settings with high uncertainty avoidance, improving  
58  
59  
60

1  
2  
3  
4  
5  
6  
7  
8  
9  
10  
11  
12  
13  
14  
15  
16  
17  
18  
19  
20  
21  
22  
23  
24  
25  
26  
27  
28  
29  
30  
31  
32  
33  
34  
35  
36  
37  
38  
39  
40  
41  
42  
43  
44  
45  
46  
47  
48  
49  
50  
51  
52  
53  
54  
55  
56  
57  
58  
59  
60

364 access to low-cost, rapid tests could prove beneficial in supporting GPs' prescribing  
365 decisions.

For peer review only

## 367 **ACKNOWLEDGEMENTS**

368 We would like to extend our gratitude to all participating GPs for their dedication throughout  
369 this study. Thanks also to Dr Senia Rosales-Klintz for her support and for helping setting up  
370 this surveillance study. We also thank Dr Wilfred Galea (TheSynapse, <https://thesynapse.net>)  
371 and Dr Philip Sciortino (Malta College of Family Doctors) for assisting us during GP  
372 recruitment. Finally, thank you Cecilia Lindsjö and Vijaylakshmi Prabhu for helping with  
373 data input and feedback report writing, and Raycine Debono for assistance with data  
374 management.

## 375 **AUTHORS' CONTRIBUTIONS**

376 EASG, CSL and MAB were involved in the conception of the research study and design of  
377 the surveillance data collection sheet. EASG carried out all data collection and was  
378 responsible for data management throughout the study's duration. This included maintaining  
379 contact with all GPs and overseeing the writing of feedback reports which were subsequently  
380 distributed by EASG. EASG and ADH cleaned the dataset. EASG ran statistical analyses with  
381 input from ADH and NO. EASG was responsible for drafting the manuscript. EASG, ADH,  
382 PZ, NO, MAB and CSL were involved in the interpretation of data and critical revision of the  
383 manuscript. EASG produced the final version of the manuscript which was approved by all  
384 authors.

## 385 **FUNDING**

386 This work was supported by Karolinska Institutet funding for doctoral education (KID-  
387 funding 3-1233/2013). It was also supported by funding available to CSL at Karolinska  
388 Institutet. This research received no other specific grant from any public, commercial or not-  
389 for-profit funding agencies.

## 390 **COMPETING INTERESTS**

1  
2  
3 391 None declared.  
4  
5

6 392 **ETHICAL APPROVAL**  
7

8  
9 393 The University of Malta Research Ethics Committee granted ethical approval and research  
10  
11 394 was conducted in accordance with the Declaration of Helsinki. GP participation was voluntary  
12  
13 395 and informed consent was obtained. GPs could terminate participation at any time, for any  
14  
15 396 reason, without consequence. GP identities were masked using randomly assigned unique  
16  
17 397 identification codes and no personal information was made public. Finally, all patient data  
18  
19 398 collected by GPs was non-identifiable.  
20  
21  
22

23 399 **DATA AVAILABILITY STATEMENT**  
24

25  
26 400 All data relevant to the study are included in the article or uploaded as supplementary  
27  
28 401 information. No additional data are available.  
29  
30  
31  
32  
33  
34  
35  
36  
37  
38  
39  
40  
41  
42  
43  
44  
45  
46  
47  
48  
49  
50  
51  
52  
53  
54  
55  
56  
57  
58  
59  
60

402 **REFERENCES**

- 403 1. World Health Organization. *Antimicrobial Resistance: Global Report on Surveillance*.  
404 Geneva: WHO, 2014.
- 405 2. Becattini S, Taur Y, Pamer EG. Antibiotic-induced changes in the intestinal microbiota  
406 and disease. *Trends Mol Med* 2016;22:458-78.
- 407 3. Goossens H, Ferech M, Vander Stichele R, *et al*. Outpatient antibiotic use in Europe and  
408 association with resistance: a cross-national database study. *Lancet* 2005;365:579-87.
- 409 4. Ababneh MA, Al-Azzam SI, Ababneh R, *et al*. Antibiotic prescribing for acute  
410 respiratory infections in children in Jordan. *Int Health* 2017;9:124-30.
- 411 5. Saliba-Gustafsson EA, Dunberger Hampton A, Zarb P, *et al*. Antibiotic prescribing for  
412 respiratory tract complaints in Malta: a 1 year repeated cross-sectional surveillance study.  
413 *J Antimicrob Chemother* 2019;74:1116-24.
- 414 6. Bagger K, Nielsen ABS, Siersma V, *et al*. Inappropriate antibiotic prescribing and  
415 demand for antibiotics in patients with upper respiratory tract infections is hardly  
416 different in female versus male patients as seen in primary care. *Eur J Gen Pract*  
417 2015;21:118-23.
- 418 7. Dekker ARJ, Verheij TJM, van der Velden AW. Inappropriate antibiotic prescription for  
419 respiratory tract indications: most prominent in adult patients. *Fam Pract* 2015;32:401-7.
- 420 8. André M, Odenholt I, Schwan A, *et al*. Upper respiratory tract infections in general  
421 practice: diagnosis, antibiotic prescribing, duration of symptoms and use of diagnostic  
422 tests. *Scand J Infect Dis* 2002;34:880-6.
- 423 9. Aabenhus R, Hansen MP, Saust LT, *et al*. Characterisation of antibiotic prescriptions for  
424 acute respiratory tract infections in Danish general practice: a retrospective registry based  
425 cohort study. *NPJ Prim Care Respir Med* 2017;27:37.

- 1  
2  
3 426 10. Cordoba G, Caballero L, Sandholdt H, *et al.* Antibiotic prescriptions for suspected  
4  
5 427 respiratory tract infection in primary care in South America. *J Antimicrob Chemother*  
6  
7 428 2017;72:305-10.  
8  
9  
10 429 11. Murphy M, Bradley CP, Byrne S. Antibiotic prescribing in primary care, adherence to  
11  
12 430 guidelines and unnecessary prescribing: an Irish perspective. *BMC Fam Pract*  
13  
14 431 2012;13:43.  
15  
16  
17 432 12. McKay R, Mah A, Law MR, *et al.* Systematic review of factors associated with antibiotic  
18  
19 433 prescribing for respiratory tract infections. *Antimicrob Agents Chemother* 2016;60:4106-  
20  
21 434 18.  
22  
23  
24 435 13. O'Connor R, O'Doherty J, O'Regan A, *et al.* Antibiotic use for acute respiratory tract  
25  
26 436 infections (ARTI) in primary care: what factors affect prescribing and why is it  
27  
28 437 important? A narrative review. *Ir J Med Sci* 2018;187:969-86.  
29  
30  
31 438 14. Borg MA. National cultural dimensions as drivers of inappropriate ambulatory care  
32  
33 439 consumption of antibiotics in Europe and their relevance to awareness campaigns. *J*  
34  
35 440 *Antimicrob Chemother* 2012;67:763-7.  
36  
37  
38 441 15. Deschepper R, Grigoryan L, Stålsby Lundborg C, *et al.* Are cultural dimensions relevant  
39  
40 442 for explaining cross-national differences in antibiotic use in Europe? *BMC Health Serv*  
41  
42 443 *Res* 2008;8:123.  
43  
44  
45 444 16. TNS Opinion & Social. *Special Eurobarometer 407: Antimicrobial Resistance*. Brussels:  
46  
47 445 European Commission, 2013.  
48  
49  
50 446 17. TNS Opinion & Social. *Special Eurobarometer 445: Antimicrobial Resistance*. Brussels:  
51  
52 447 European Commission, 2016.  
53  
54  
55 448 18. Zarb P, Borg MA. Consumption of antibiotics within ambulatory care in Malta. *Malta*  
56  
57 449 *Med J* 2011;23:13-18.  
58  
59  
60

- 1  
2  
3 450 19. European Centre for Disease Prevention and Control. *Antimicrobial consumption*. In:  
4  
5 451 Annual epidemiological report for 2017. Stockholm: ECDC, 2018.  
6  
7  
8 452 20. Saliba-Gustafsson EA, Borg MA, Rosales-Klintz S, *et al*. Maltese Antibiotic Stewardship  
9  
10 453 Programme in the Community (MASPIC): protocol of a prospective quasiexperimental  
11  
12 454 social marketing intervention. *BMJ Open* 2017;7:e017992.  
13  
14  
15 455 21. Gjelstad S, Straand J, Dalen I, *et al*. Do general practitioners' consultation rates influence  
16  
17 456 their prescribing patterns of antibiotics for acute respiratory tract infections? *J Antimicrob*  
18  
19 457 *Chemother* 2011;66:2425-33.  
20  
21  
22 458 22. Akkerman AE, Kuyvenhoven MM, van der Wouden JC, *et al*. Prescribing antibiotics for  
23  
24 459 respiratory tract infections by GPs: management and prescriber characteristics. *Br J Gen*  
25  
26 460 *Pract* 2005;55:114-8.  
27  
28  
29 461 23. Di Martino M, Lallo A, Kirchmayer U, *et al*. Prevalence of antibiotic prescription in  
30  
31 462 pediatric outpatients in Italy: the role of local health districts and primary care physicians  
32  
33 463 in determining variation. A multilevel design for healthcare decision support. *BMC*  
34  
35 464 *Public Health* 2017;17:886.  
36  
37  
38  
39 465 24. Specialist Accreditation Committee Malta. *Minimum Criteria for Entry to the Specialist*  
40  
41 466 *Medical Registers*. Malta: Specialist Accreditation Committee Malta, 2006.  
42  
43  
44 467 25. Roter DL, Hall JA, Aoki Y. Physician gender effects in medical communication: a meta-  
45  
46 468 analytic review. *JAMA* 2002;288:756-64.  
47  
48  
49 469 26. Rico-Ferreira P, Palazón-Bru A, Calvo-Pérez M, *et al*. Nonadherence to guidelines for  
50  
51 470 prescribing antibiotic therapy to patients with tonsillitis or pharyngotonsillitis: a cross-  
52  
53 471 sectional study. *Curr Med Res Opin* 2015;31:1319-22.  
54  
55  
56  
57  
58  
59  
60

- 1  
2  
3 472 27. Eggermont D, Smit MAM, Kwestroo GA, *et al.* The influence of gender concordance  
4  
5 473 between general practitioner and patient on antibiotic prescribing for sore throat  
6  
7 474 symptoms: a retrospective study. *BMC Fam Pract* 2018;19:175.  
8  
9  
10 475 28. Haeseker MB, Dukers-Muijers NH, Hoebe CJ, *et al.* Trends in antibiotic prescribing in  
11  
12 476 adults in Dutch general practice. *PloS One* 2012;7:e51860.  
13  
14  
15 477 29. Dallas A, Magin P, Morgan S, *et al.* Antibiotic prescribing for respiratory infections: a  
16  
17 478 cross-sectional analysis of the ReCEnT study exploring the habits of early-career doctors  
18  
19 479 in primary care. *Fam Pract* 2015;32:49-55.  
20  
21  
22 480 30. Majeed A, Moser K. Age- and sex-specific antibiotic prescribing patterns in general  
23  
24 481 practice in England and Wales in 1996. *Br J Gen Pract* 1999;49:735-6.  
25  
26  
27 482 31. Ternhag A, Grunewald M, Naucler P, *et al.* Antibiotic consumption in relation to socio-  
28  
29 483 demographic factors, co-morbidity, and accessibility of primary health care. *Scand J*  
30  
31 484 *Infect Dis* 2014;46:888-96.  
32  
33  
34 485 32. Shallcross L, Beckley N, Rait G, *et al.* Antibiotic prescribing frequency amongst patients  
35  
36 486 in primary care: a cohort study using electronic health records. *J Antimicrob Chemother*  
37  
38 487 2017;72:1818-24.  
39  
40  
41 488 33. Stanton N, Hood K, Kelly MJ, *et al.* Are smokers with acute cough in primary care  
42  
43 489 prescribed antibiotics more often, and to what benefit? An observational study in 13  
44  
45 490 European countries. *Eur Respir J* 2010;35:761-7.  
46  
47  
48 491 34. Manne M, Deshpande A, Hu B, *et al.* Provider variation in antibiotic prescribing and  
49  
50 492 outcomes of respiratory tract infections. *South Med J* 2018;111:235-42.  
51  
52  
53 493 35. Fischer T, Fischer S, Kochen MM, *et al.* Influence of patient symptoms and physical  
54  
55 494 findings on general practitioners' treatment of respiratory tract infections: a direct  
56  
57 495 observation study. *BMC Fam Pract* 2005;6:6.  
58  
59  
60

- 1  
2  
3 496 36. Moro ML, Marchi M, Gagliotti C, *et al.* Why do paediatricians prescribe antibiotics?  
4  
5 497 Results of an Italian regional project. *BMC Pediatr* 2009;9:69.  
6  
7  
8 498 37. Wald ER, Applegate KE, Bordley C, *et al.* Clinical practice guideline for the diagnosis  
9  
10 499 and management of acute bacterial sinusitis in children aged 1 to 18 years. *Pediatrics*  
11  
12 500 2013;132:e262-80.  
13  
14  
15 501 38. Butler CC, Hood K, Verheij T, *et al.* Variation in antibiotic prescribing and its impact on  
16  
17 502 recovery in patients with acute cough in primary care: prospective study in 13 countries.  
18  
19 503 *BMJ* 2009;338:b2242.  
20  
21  
22 504 39. Ashworth M, White P, Jongsma H, *et al.* Antibiotic prescribing and patient satisfaction in  
23  
24 505 primary care in England: cross-sectional analysis of national patient survey data and  
25  
26 506 prescribing data. *Br J Gen Pract* 2016;66:e40-6.  
27  
28  
29 507 40. Coenen S, Francis N, Kelly M, *et al.* Are patient views about antibiotics related to  
30  
31 508 clinician perceptions, management and outcome? A multi-country study in outpatients  
32  
33 509 with acute cough. *PLoS One* 2013;8:e76691.  
34  
35  
36  
37 510 41. Cockburn J, Pit S. Prescribing behaviour in clinical practice: patients' expectations and  
38  
39 511 doctors' perceptions of patients' expectations: a questionnaire study. *BMJ* 1997;315: 520-  
40  
41 512 3.  
42  
43  
44 513 42. Akkerman AE, Kuyvenhoven MM, van der Wouden JC, *et al.* Determinants of antibiotic  
45  
46 514 overprescribing in respiratory tract infections in general practice. *J Antimicrob*  
47  
48 515 *Chemother* 2005;56:930-6.  
49  
50  
51 516 43. Welschen I, Kuyvenhoven M, Hoes A, *et al.* Antibiotics for acute respiratory tract  
52  
53 517 symptoms: patients' expectations, GPs' management and patient satisfaction. *Fam Pract*  
54  
55 518 2004;21:234-7.  
56  
57  
58  
59  
60

- 1  
2  
3 519 44. Drekonja DM, Filice GA, Greer N, *et al.* Antimicrobial stewardship in outpatient  
4  
5 520 settings: a systematic review. *Infect Control Hosp Epidemiol* 2015;36:142-52.  
6  
7  
8 521 45. Butler CC, Rollnick S, Kinnersley P, *et al.* Reducing antibiotics for respiratory tract  
9  
10 522 symptoms in primary care: consolidating ‘why’ and considering ‘how’. *Br J Gen Pract*  
11  
12 523 1998;48:1865-70.  
13  
14  
15 524 46. Llor, C, Bjerrum L, Munck A, *et al.* Access to point-of-care tests reduces the prescription  
16  
17 525 of antibiotics among antibiotic-requesting subjects with respiratory tract infections.  
18  
19 526 *Respir Care* 2014;59:1918-23.  
20  
21  
22 527 47. Anthierens S, Tonkin-Crine S, Douglas E, *et al.* General practitioners’ views on the  
23  
24 528 acceptability and applicability of a web-based intervention to reduce antibiotic  
25  
26 529 prescribing for acute cough in multiple European countries: a qualitative study prior to a  
27  
28 530 randomised trial. *BMC Fam Pract* 2012;13:101.  
29  
30  
31  
32 531 48. André M, Gröndal H, Strandberg, EL, *et al.* Uncertainty in clinical practice: an interview  
33  
34 532 study with Swedish GPs on patients with sore throat. *BMC Fam Pract* 2016;17:56.  
35  
36  
37 533 49. Bjerrum L, Munck A, Gahrn-Hansen B, *et al.* Health Alliance for Prudent Prescribing,  
38  
39 534 Yield and Use of Antimicrobial Drugs in the Treatment of Respiratory Tract Infections  
40  
41 535 (HAPPY AUDIT). *BMC Fam Pract* 2010;11:29.  
42  
43  
44 536 50. André M, Vernby A, Odenholt I, *et al.* Diagnosis-prescribing surveys in 2000, 2002 and  
45  
46 537 2005 in Swedish general practice: consultations, diagnosis, diagnostics and treatment  
47  
48 538 choices. *Scand J Infect Dis* 2008;40:648-54.  
49  
50  
51 539 51. Hemkens LG, Saccilotto R, Reyes SL, *et al.* Personalized prescription feedback using  
52  
53 540 routinely collected data to reduce antibiotic use in primary care: a randomized clinical  
54  
55 541 trial. *JAMA Intern Med* 2017;177:176-83.  
56  
57  
58  
59  
60

## TABLES (1)

**Table 1. Univariable and multivariable analyses of GP-, practice- and consultation-level factors associated with antibiotic prescription**

|                                                         |                            | AB prescribed |        | AB not prescribed |        | Univariable analysis* |         | Multivariable analysis** |               |
|---------------------------------------------------------|----------------------------|---------------|--------|-------------------|--------|-----------------------|---------|--------------------------|---------------|
|                                                         |                            | n             | (%)    | n                 | (%)    | OR (95% CI)           | p-value | OR (95% CI)              | p-value       |
| <b>GP sex</b>                                           | male                       | 1,666         | (45.1) | 2,028             | (54.9) | 1                     | 0.762   | 1                        | <b>0.010</b>  |
|                                                         | female                     | 368           | (44.7) | 456               | (55.3) | 1.10 (0.58-2.10)      |         | 2.28 (1.22-4.26)         |               |
| <b>GP age (years)</b>                                   | 28-39                      | 188           | (23.9) | 600               | (76.1) | 1                     | 0.000#  | 1                        | <b>0.000#</b> |
|                                                         | 40-49                      | 494           | (42.2) | 678               | (57.8) | 1.97 (1.05-3.70)      |         | 1.45 (0.71-2.96)         |               |
|                                                         | 50-59                      | 1,018         | (47.5) | 1,125             | (52.5) | 2.53 (1.42-4.51)      |         | 2.12 (1.19-3.77)         |               |
|                                                         | ≥60                        | 334           | (80.5) | 81                | (19.5) | 9.57 (3.78-24.21)     |         | 34.67 (14.14-84.98)      |               |
|                                                         | <10                        | 183           | (23.7) | 589               | (76.3) | 1                     | 0.026#  |                          |               |
| <b>Years of practice as a GP (n=4,502)</b>              | 10-19                      | 301           | (40.3) | 446               | (59.7) | 1.77 (0.73-4.32)      |         | –                        | –             |
|                                                         | 20-29                      | 1,051         | (49.5) | 1,074             | (50.5) | 2.81 (1.34-5.92)      |         |                          |               |
|                                                         | ≥30                        | 494           | (57.6) | 364               | (42.4) | 3.05 (1.32-7.05)      |         |                          |               |
|                                                         | <22                        | 1,090         | (49.0) | 1,135             | (51.0) | 1                     | 0.488   | –                        | –             |
| <b>Total no. of patients examined per day (n=4,436)</b> | ≥22                        | 913           | (41.3) | 1,298             | (58.7) | 0.95 (0.83-1.09)      |         | –                        | –             |
|                                                         | full-time                  | 1,437         | (42.2) | 1,966             | (57.8) | 1                     | 0.217   | –                        | –             |
| <b>Type of employment</b>                               | part-time                  | 597           | (53.5) | 518               | (46.5) | 1.45 (0.80-2.60)      |         |                          |               |
|                                                         | group                      | 643           | (39.5) | 987               | (60.5) | 1                     | 0.062   | –                        | –             |
| <b>Type of practice<sup>†</sup></b>                     | solo                       | 1,391         | (48.2) | 1,497             | (51.8) | 1.73 (0.97-3.08)      |         |                          |               |
|                                                         | public healthcentre clinic | 318           | (34.2) | 611               | (65.8) | 1                     | 0.063#  |                          |               |
| <b>Location of GP practice</b>                          | private GP clinic          | 897           | (46.1) | 1,050             | (53.9) | 1.98 (0.97-4.01)      |         | –                        | –             |
|                                                         | private pharmacy clinic    | 819           | (49.9) | 823               | (50.1) | 2.27 (1.10-4.68)      |         |                          |               |
|                                                         | clinic                     | 1,428         | (44.8) | 1,759             | (55.2) | 1                     | 0.016   | –                        | –             |
| <b>Location of consultation (n=4,263)</b>               | home                       | 466           | (43.3) | 610               | (56.7) | 1.20 (1.03-1.38)      |         |                          |               |
|                                                         | no                         | 991           | (38.9) | 1,558             | (61.1) | 1                     | 0.021   | 1                        | <b>0.016</b>  |
| <b>Regular client</b>                                   | yes                        | 1,043         | (53.0) | 926               | (47.0) | 1.23 (1.03-1.48)      |         | 1.32 (1.05-1.66)         |               |
|                                                         | no                         | 1,983         | (44.6) | 2,459             | (55.4) | 1                     | 0.000   | 1                        | <b>0.000</b>  |
| <b>Antibiotics requested</b>                            | yes                        | 51            | (67.1) | 25                | (32.9) | 2.46 (1.57-3.86)      |         | 4.76 (2.52-8.99)         |               |

**NOTE.** \*n=4,518 unless otherwise specified; \*\*n=4,425 in final multivariable population-averaged panel-data model using generalised estimating equations which was also adjusted for patient age, smoking status, no. of signs and symptoms, fever (>38.5°C), productive cough, non-productive cough, sore throat, rhinorrhoea, otalgia, tender cervical nodes and dyspnoea; <sup>†</sup>GPs working in public sector healthcentres were defined as group practice practitioners; AB - antibiotic; CI - confidence interval; GP - general practitioner; OR - odds ratio; #Wald test; p-values highlighted bold indicate independent variables statistically significant at p<0.05; '–' predictor excluded from model

## TABLES (2)

| Table 2. Univariable and multivariable analyses of patient sociodemographic factors associated with antibiotic prescription |                 |               |        |                   |        |                       |               |                          |               |
|-----------------------------------------------------------------------------------------------------------------------------|-----------------|---------------|--------|-------------------|--------|-----------------------|---------------|--------------------------|---------------|
|                                                                                                                             |                 | AB prescribed |        | AB not prescribed |        | Univariable analysis* |               | Multivariable analysis** |               |
|                                                                                                                             |                 | n             | (%)    | n                 | (%)    | OR (95% CI)           | p-value       | OR (95% CI)              | p-value       |
| <b>Sex</b> (n=4,508)                                                                                                        | male            | 910           | (43.1) | 1,203             | (56.9) | 1                     | 0.037         | –                        | –             |
|                                                                                                                             | female          | 1,118         | (46.7) | 1,277             | (53.3) | 1.12 (1.01-1.25)      |               |                          |               |
| <b>Age (years)</b> (n=4,511)                                                                                                | <5              | 194           | (35.7) | 350               | (64.3) | 1                     | <b>0.000#</b> | 1                        | <b>0.000#</b> |
|                                                                                                                             | 5-11            | 247           | (43.3) | 324               | (56.7) | 1.37 (1.09-1.72)      |               | 1.55 (1.15-2.08)         |               |
|                                                                                                                             | 12-17           | 164           | (45.9) | 193               | (54.1) | 1.40 (1.08-1.80)      |               | 1.74 (1.24-2.44)         |               |
|                                                                                                                             | 18-24           | 215           | (46.0) | 252               | (54.0) | 1.47 (1.16-1.87)      |               | 1.71 (1.24-2.36)         |               |
|                                                                                                                             | 25-44           | 586           | (45.6) | 699               | (54.4) | 1.61 (1.33-1.96)      |               | 1.82 (1.40-2.37)         |               |
|                                                                                                                             | 45-64           | 367           | (46.5) | 423               | (53.5) | 1.56 (1.26-1.92)      |               | 1.72 (1.30-2.29)         |               |
|                                                                                                                             | ≥65             | 260           | (52.3) | 237               | (47.7) | 1.86 (1.47-2.35)      |               | 2.33 (1.71-3.18)         |               |
| <b>Educational level</b> (n=4,484)                                                                                          | pre-school      | 181           | (36.5) | 315               | (63.5) | 1                     | 0.002#        |                          |               |
|                                                                                                                             | primary         | 327           | (43.5) | 424               | (56.5) | 1.23 (0.99-1.53)      |               |                          |               |
|                                                                                                                             | secondary       | 850           | (47.1) | 953               | (52.9) | 1.43 (1.18-1.74)      |               |                          |               |
|                                                                                                                             | upper-secondary | 351           | (45.2) | 425               | (54.8) | 1.38 (1.11-1.71)      |               | –                        | –             |
|                                                                                                                             | tertiary        | 268           | (49.2) | 277               | (50.8) | 1.57 (1.24-1.98)      |               |                          |               |
|                                                                                                                             | none achieved   | 46            | (40.7) | 67                | (59.3) | 1.20 (0.81-1.79)      |               |                          |               |
| <b>No. of persons per household</b> (n=4,465)                                                                               | 1-2             | 551           | (50.7) | 536               | (49.3) | 1                     | 0.000#        |                          |               |
|                                                                                                                             | 3-4             | 1,131         | (42.1) | 1,556             | (57.9) | 0.74 (0.65-0.85)      |               | –                        | –             |
|                                                                                                                             | ≥5              | 328           | (47.5) | 363               | (52.5) | 0.91 (0.76-1.09)      |               |                          |               |
| <b>Contact with children &lt;5 years</b> (n=4,481)                                                                          | no              | 1,290         | (44.8) | 1,591             | (55.2) | 1                     | 0.198         | –                        | –             |
|                                                                                                                             | yes             | 727           | (45.4) | 873               | (54.6) | 0.93 (0.82-1.04)      |               |                          |               |
| <b>Current smoker</b> (n=4,453)                                                                                             | no              | 1,614         | (43.4) | 2,104             | (56.6) | 1                     | 0.000         | 1                        | <b>0.002</b>  |
|                                                                                                                             | yes             | 402           | (54.7) | 333               | (45.3) | 1.64 (1.42-1.91)      |               | 1.39 (1.13-1.71)         |               |

NOTE. \*n=4,518 unless otherwise specified; \*\*n=4,425 in final multivariable population-averaged panel-data model using generalised estimating equations which was also adjusted for GP sex, GP age, regular client, antibiotics requested, no. of signs and symptoms, fever (>38.5°C), productive cough, non-productive cough, sore throat, rhinorrhoea, otalgia, tender cervical nodes and dyspnoea; AB - antibiotic; CI - confidence interval; OR - odds ratio; #Wald test; p-values highlighted bold indicate independent variables statistically significant at p<0.05; '-' predictor excluded from model

## TABLES (3)

| Table 3. Univariable and multivariable analyses of clinical factors associated with antibiotic prescription |     |               |        |                   |        |                       |                    |                          |              |
|-------------------------------------------------------------------------------------------------------------|-----|---------------|--------|-------------------|--------|-----------------------|--------------------|--------------------------|--------------|
|                                                                                                             |     | AB prescribed |        | AB not prescribed |        | Univariable analysis* |                    | Multivariable analysis** |              |
|                                                                                                             |     | n             | (%)    | n                 | (%)    | OR (95% CI)           | p-value            | OR (95% CI)              | p-value      |
| <b>Comorbidities (n=4,218)</b>                                                                              | no  | 1,473         | (44.5) | 1,834             | (55.5) | 1                     | 0.004              | –                        | –            |
|                                                                                                             | yes | 442           | (48.5) | 469               | (51.5) | 1.23 (1.07-1.41)      |                    |                          |              |
| <b>Duration of symptoms (days) (n=4,470)</b>                                                                | <1  | 135           | (35.3) | 248               | (64.7) | 1                     | 0.160 <sup>#</sup> |                          |              |
|                                                                                                             | 1-3 | 1,369         | (46.4) | 1,581             | (53.6) | 1.26 (1.02-1.55)      |                    |                          |              |
|                                                                                                             | 4-7 | 362           | (45.0) | 443               | (55.0) | 1.25 (0.98-1.59)      |                    | –                        | –            |
|                                                                                                             | ≥8  | 144           | (43.4) | 188               | (56.6) | 1.34 (1.01-1.78)      |                    |                          |              |
|                                                                                                             | 1   | 405           | (37.1) | 687               | (62.9) | 1                     | 0.000 <sup>#</sup> | 1                        | <b>0.000</b> |
| <b>No. of signs and symptoms (n=4,497)</b>                                                                  | 2   | 700           | (39.8) | 1,060             | (60.2) | 2.25 (1.90-2.68)      |                    | 2.89 (2.26-3.69)         |              |
|                                                                                                             | 3   | 591           | (51.1) | 565               | (48.9) | 4.15 (3.42-5.03)      |                    | 6.72 (4.73-9.55)         |              |
|                                                                                                             | ≥4  | 331           | (67.7) | 158               | (32.3) | 6.32 (4.97-8.02)      |                    | 9.62 (5.78-15.99)        |              |
|                                                                                                             | no  | 1,070         | (33.4) | 2,138             | (66.6) | 1                     | 0.000              | 1                        | <b>0.000</b> |
| <b>Fever (&gt;38.5°C)</b>                                                                                   | yes | 964           | (73.6) | 346               | (26.4) | 4.74 (4.12-5.45)      |                    | 2.60 (2.08-3.26)         |              |
|                                                                                                             | no  | 1,153         | (36.8) | 1,983             | (63.2) | 1                     | 0.000              | 1                        | <b>0.028</b> |
| <b>Productive cough</b>                                                                                     | yes | 881           | (63.8) | 501               | (36.2) | 2.49 (2.19-2.83)      |                    | 1.29 (1.03-1.61)         |              |
|                                                                                                             | no  | 1,701         | (55.1) | 1,384             | (44.9) | 1                     | 0.000              | 1                        | <b>0.000</b> |
| <b>Non-productive cough</b>                                                                                 | yes | 333           | (23.2) | 1,100             | (76.8) | 0.35 (0.31-0.41)      |                    | 0.33 (0.26-0.41)         |              |
|                                                                                                             | no  | 1,055         | (44.8) | 1,300             | (55.2) | 1                     | 0.099              | 1                        | <b>0.000</b> |
| <b>Sore throat</b>                                                                                          | yes | 979           | (45.3) | 1,184             | (54.7) | 1.10 (0.98-1.23)      |                    | 0.64 (0.53-0.78)         |              |
|                                                                                                             | no  | 1,530         | (53.8) | 1,312             | (46.2) | 1                     | 0.000              | 1                        | <b>0.000</b> |
| <b>Rhinorrhoea</b>                                                                                          | yes | 504           | (30.1) | 1,172             | (69.9) | 0.41 (0.36-0.47)      |                    | 0.28 (0.23-0.36)         |              |
|                                                                                                             | no  | 1,795         | (43.7) | 2,315             | (56.3) | 1                     | 0.000              | 1                        | <b>0.043</b> |
| <b>Otalgia</b>                                                                                              | yes | 239           | (58.6) | 169               | (41.4) | 1.62 (1.34-1.97)      |                    | 1.33 (1.01-1.76)         |              |
|                                                                                                             | no  | 1,777         | (42.6) | 2,397             | (57.4) | 1                     | 0.000              | 1                        | <b>0.000</b> |
| <b>Tender cervical nodes</b>                                                                                | yes | 257           | (74.7) | 87                | (25.3) | 4.08 (3.22-5.16)      |                    | 2.19 (1.57-3.05)         |              |
|                                                                                                             | no  | 1,908         | (44.8) | 2,350             | (55.2) | 1                     | 0.001              | 1                        | <b>0.003</b> |
| <b>Dyspnoea</b>                                                                                             | yes | 126           | (48.5) | 134               | (51.5) | 1.51 (1.19-1.92)      |                    | 0.58 (0.41-0.83)         |              |
|                                                                                                             | no  | 1,860         | (43.7) | 2,397             | (56.3) | 1                     | 0.000              | –                        | –            |
| <b>Sibilant rhonchi</b>                                                                                     | yes | 174           | (66.7) | 87                | (33.3) | 1.75 (1.37-2.25)      |                    |                          |              |

NOTE. \*n=4,518 unless otherwise specified; \*\*n=4,425 in final multivariable population-averaged panel-data model using generalised estimating equations which was also adjusted for GP sex, GP age, regular client, antibiotics requested, patient age and smoking status; AB - antibiotic; CI - confidence interval; OR - odds ratio; <sup>#</sup>Wald test; p-values highlighted bold indicate independent variables statistically significant at p<0.05; '–' predictor excluded from model

1  
2  
3  
4  
5  
6  
7  
8  
9  
10  
11  
12  
13  
14  
15  
16  
17  
18  
19  
20  
21  
22  
23  
24  
25  
26  
27  
28  
29  
30  
31  
32  
33  
34  
35  
36  
37  
38  
39  
40  
41  
42  
43  
44  
45  
46

543

For peer review only

**SUPPLEMENTARY FILES (1)**

GP code [for office use only]:

**GP demographics**

Date: \_\_\_\_\_

|                                                                                                           |                                         |                                                                                                                             |
|-----------------------------------------------------------------------------------------------------------|-----------------------------------------|-----------------------------------------------------------------------------------------------------------------------------|
| 1) Date of birth:                                                                                         |                                         |                                                                                                                             |
| 2) Sex: <input type="checkbox"/> Male <input type="checkbox"/> Female                                     |                                         |                                                                                                                             |
| 3) Country of birth:                                                                                      |                                         |                                                                                                                             |
| 4) Home address:                                                                                          |                                         |                                                                                                                             |
| 5) E-mail address:                                                                                        |                                         |                                                                                                                             |
| 6a) Telephone no.:                                                                                        |                                         | 6b) Mobile no.:                                                                                                             |
| 7) Country where you obtained your medical undergrad. degree:                                             |                                         |                                                                                                                             |
| 8) Years of practice as a doctor (in total):                                                              |                                         |                                                                                                                             |
| 9a) Year of specialisation in family medicine (if specialised):                                           |                                         |                                                                                                                             |
| 9b) Did you fall under the 'grandfather clause' <sup>1</sup> ?                                            |                                         | <input type="checkbox"/> Yes <input type="checkbox"/> No                                                                    |
| 9c) Are you currently a trainee?                                                                          |                                         | <input type="checkbox"/> Yes <input type="checkbox"/> No                                                                    |
| 10) Years of practice as a GP:                                                                            |                                         |                                                                                                                             |
| 11) How much do you currently work? <input type="checkbox"/> Part-time <input type="checkbox"/> Full-time |                                         |                                                                                                                             |
| 12) Approximately how many patients do you meet daily?                                                    |                                         |                                                                                                                             |
| 13) Health sector of practice (please tick all relevant options):                                         | <b>Type of Sector</b>                   | <b>Location</b>                                                                                                             |
|                                                                                                           | <input type="checkbox"/> Public sector  | <input type="checkbox"/> Healthcare centre<br><input type="checkbox"/> Home visits                                          |
|                                                                                                           | <input type="checkbox"/> Solo practice  | <input type="checkbox"/> Private clinic<br><input type="checkbox"/> Pharmacy clinic<br><input type="checkbox"/> Home visits |
|                                                                                                           | <input type="checkbox"/> Group practice | <input type="checkbox"/> Private clinic<br><input type="checkbox"/> Pharmacy clinic<br><input type="checkbox"/> Home visits |
|                                                                                                           | <input type="checkbox"/> Company doctor |                                                                                                                             |

<sup>1</sup> Being recognised as a fully competent specialist in family medicine, on the basis of acquired experience.

|                                                                                                                                                                     |                                       |
|---------------------------------------------------------------------------------------------------------------------------------------------------------------------|---------------------------------------|
| 14) Areas within which you conduct home visits (if applicable):                                                                                                     |                                       |
| 15) Please write the addresses of your practice/s and tick your main clinic of practice: (N.B. If you work in a pharmacy, please include the name of that pharmacy) |                                       |
| Address                                                                                                                                                             | Main clinic of practice (please tick) |
|                                                                                                                                                                     | <input type="checkbox"/>              |

Thank you for your input!

**Figure S1.** General practitioner (GP) demographics form

## 1 SUPPLEMENTARY FILES (2)

2 **Table S1. General practitioner (GP) characteristics (n=33)**

|                                     |                            | <b>n</b> | <b>(%)</b> |
|-------------------------------------|----------------------------|----------|------------|
| <b>Sex</b>                          | male                       | 24       | (72.7)     |
|                                     | female                     | 9        | (27.3)     |
| <b>Age (years)</b>                  | 28-39                      | 7        | (21.2)     |
|                                     | 40-49                      | 9        | (27.3)     |
|                                     | 50-59                      | 14       | (42.4)     |
|                                     | ≥60                        | 3        | (9.1)      |
|                                     | <10                        | 6        | (18.7)     |
| <b>Years of GP practice (n=32)</b>  | 10-19                      | 5        | (15.6)     |
|                                     | 20-29                      | 14       | (43.8)     |
|                                     | ≥30                        | 7        | (21.9)     |
| <b>GP trainee</b>                   | no                         | 30       | (90.9)     |
|                                     | yes                        | 3        | (9.1)      |
| <b>Type of employment</b>           | part-time                  | 11       | (33.3)     |
|                                     | full-time                  | 22       | (66.7)     |
| <b>Practice location</b>            | public healthcentre clinic | 13       | (39.4)     |
|                                     | private clinic             | 14       | (42.4)     |
|                                     | private pharmacy clinic    | 11       | (33.3)     |
| <b>Type of practice<sup>†</sup></b> | group                      | 16       | (48.5)     |
|                                     | solo                       | 17       | (51.5)     |

NOTE. <sup>†</sup>GPs working in public sector healthcentres were defined as group practice practitioners

## 3 SUPPLEMENTARY FILES (3)

4  
 7 **Table S2. Sociodemographic and lifestyle characteristics of patients with**  
 8 **acute respiratory tract complaints**

|                                                     |                 | n     | (%)    |
|-----------------------------------------------------|-----------------|-------|--------|
| <b>Sex</b> (n=4,508)                                | male            | 2,113 | (46.9) |
|                                                     | female          | 2,395 | (53.1) |
| <b>Age (years)</b> (n=4,511)                        | <5              | 544   | (12.1) |
|                                                     | 5-11            | 571   | (12.7) |
|                                                     | 12-17           | 357   | (7.9)  |
|                                                     | 18-24           | 467   | (10.3) |
|                                                     | 25-44           | 1,285 | (28.5) |
|                                                     | 45-64           | 790   | (17.5) |
| <b>Educational level</b> (n=4,484)                  | ≥65             | 497   | (11.0) |
|                                                     | pre-school      | 496   | (11.1) |
|                                                     | primary         | 751   | (16.7) |
|                                                     | secondary       | 1,803 | (40.2) |
|                                                     | upper-secondary | 776   | (17.3) |
|                                                     | tertiary        | 545   | (12.2) |
| <b>Household size (persons/household)</b> (n=4,465) | none achieved   | 113   | (2.5)  |
|                                                     | 1-2             | 1,087 | (24.3) |
|                                                     | 3-4             | 2,687 | (60.2) |
| <b>Contact with children &lt;5 years</b> (n=4,481)  | ≥5              | 691   | (15.5) |
|                                                     | no              | 2,881 | (64.3) |
| <b>Current smoker</b> (n=4,453)                     | yes             | 1,600 | (35.7) |
|                                                     | no              | 3,718 | (83.5) |
|                                                     | yes             | 735   | (16.5) |

STROBE Statement—Checklist of items that should be included in reports of *cross-sectional studies*

|                              | Item No | Recommendation                                                                                                                                                                                               | Page No |
|------------------------------|---------|--------------------------------------------------------------------------------------------------------------------------------------------------------------------------------------------------------------|---------|
| <b>Title and abstract</b>    | 1       | (a) Indicate the study's design with a commonly used term in the title or the abstract                                                                                                                       | 1       |
|                              |         | (b) Provide in the abstract an informative and balanced summary of what was done and what was found                                                                                                          | 2-3     |
| <b>Introduction</b>          |         |                                                                                                                                                                                                              |         |
| Background/rationale         | 2       | Explain the scientific background and rationale for the investigation being reported                                                                                                                         | 5-6     |
| Objectives                   | 3       | State specific objectives, including any prespecified hypotheses                                                                                                                                             | 6       |
| <b>Methods</b>               |         |                                                                                                                                                                                                              |         |
| Study design                 | 4       | Present key elements of study design early in the paper                                                                                                                                                      | 6-7     |
| Setting                      | 5       | Describe the setting, locations, and relevant dates, including periods of recruitment, exposure, follow-up, and data collection                                                                              | 6-7     |
| Participants                 | 6       | (a) Give the eligibility criteria, and the sources and methods of selection of participants                                                                                                                  | 7-8     |
| Variables                    | 7       | Clearly define all outcomes, exposures, predictors, potential confounders, and effect modifiers. Give diagnostic criteria, if applicable                                                                     | 8       |
| Data sources/<br>measurement | 8*      | For each variable of interest, give sources of data and details of methods of assessment (measurement). Describe comparability of assessment methods if there is more than one group                         |         |
| Bias                         | 9       | Describe any efforts to address potential sources of bias                                                                                                                                                    |         |
| Study size                   | 10      | Explain how the study size was arrived at                                                                                                                                                                    |         |
| Quantitative variables       | 11      | Explain how quantitative variables were handled in the analyses. If applicable, describe which groupings were chosen and why                                                                                 | 8       |
| Statistical methods          | 12      | (a) Describe all statistical methods, including those used to control for confounding                                                                                                                        | 8-9     |
|                              |         | (b) Describe any methods used to examine subgroups and interactions                                                                                                                                          |         |
|                              |         | (c) Explain how missing data were addressed                                                                                                                                                                  | 8       |
|                              |         | (d) If applicable, describe analytical methods taking account of sampling strategy                                                                                                                           |         |
|                              |         | (e) Describe any sensitivity analyses                                                                                                                                                                        |         |
| <b>Results</b>               |         |                                                                                                                                                                                                              |         |
| Participants                 | 13*     | (a) Report numbers of individuals at each stage of study—eg numbers potentially eligible, examined for eligibility, confirmed eligible, included in the study, completing follow-up, and analysed            | 9       |
|                              |         | (b) Give reasons for non-participation at each stage                                                                                                                                                         |         |
|                              |         | (c) Consider use of a flow diagram                                                                                                                                                                           |         |
| Descriptive data             | 14*     | (a) Give characteristics of study participants (eg demographic, clinical, social) and information on exposures and potential confounders                                                                     | 9       |
|                              |         | (b) Indicate number of participants with missing data for each variable of interest                                                                                                                          |         |
| Outcome data                 | 15*     | Report numbers of outcome events or summary measures                                                                                                                                                         | 9       |
| Main results                 | 16      | (a) Give unadjusted estimates and, if applicable, confounder-adjusted estimates and their precision (eg, 95% confidence interval). Make clear which confounders were adjusted for and why they were included | 25-27   |

|                          |    |                                                                                                                                                                            |       |
|--------------------------|----|----------------------------------------------------------------------------------------------------------------------------------------------------------------------------|-------|
|                          |    | (b) Report category boundaries when continuous variables were categorized                                                                                                  | 25-27 |
|                          |    | (c) If relevant, consider translating estimates of relative risk into absolute risk for a meaningful time period                                                           |       |
| Other analyses           | 17 | Report other analyses done—eg analyses of subgroups and interactions, and sensitivity analyses                                                                             |       |
| <b>Discussion</b>        |    |                                                                                                                                                                            |       |
| Key results              | 18 | Summarise key results with reference to study objectives                                                                                                                   | 10-11 |
| Limitations              | 19 | Discuss limitations of the study, taking into account sources of potential bias or imprecision. Discuss both direction and magnitude of any potential bias                 | 14-15 |
| Interpretation           | 20 | Give a cautious overall interpretation of results considering objectives, limitations, multiplicity of analyses, results from similar studies, and other relevant evidence | 11-14 |
| Generalisability         | 21 | Discuss the generalisability (external validity) of the study results                                                                                                      | 15-16 |
| <b>Other information</b> |    |                                                                                                                                                                            |       |
| Funding                  | 22 | Give the source of funding and the role of the funders for the present study and, if applicable, for the original study on which the present article is based              | 17    |

\*Give information separately for exposed and unexposed groups.

**Note:** An Explanation and Elaboration article discusses each checklist item and gives methodological background and published examples of transparent reporting. The STROBE checklist is best used in conjunction with this article (freely available on the Web sites of PLoS Medicine at <http://www.plosmedicine.org/>, Annals of Internal Medicine at <http://www.annals.org/>, and Epidemiology at <http://www.epidem.com/>). Information on the STROBE Initiative is available at [www.strobe-statement.org](http://www.strobe-statement.org).
