# Supplementary material for: Factors associated with antibiotic prescribing in patients with acute respiratory tract complaints in Malta: a 1-year repeated cross-sectional surveillance study
Source: PubMed Central journal article supplement — BMJ Open. 2019 Dec 18;9(12):e032704. doi: 10.1136/bmjopen-2019-032704 (PMC6937012; doi:10.1136/bmjopen-2019-032704), 2019-12-18
Supplement: bmjopen-2019-032704supp001.pdf [file bmjopen-2019-032704supp001.pdf]

## SUPPLEMENTARY FILES (1)

GP code [for office use only]:

## GP demographics

Date: \_\_\_\_\_

|                                                                   |                                                                       |                                            |                                          |
|-------------------------------------------------------------------|-----------------------------------------------------------------------|--------------------------------------------|------------------------------------------|
| 1) Date of birth:                                                 |                                                                       |                                            |                                          |
| 2) Sex:                                                           | <input type="checkbox"/> Male <input type="checkbox"/> Female         |                                            |                                          |
| 3) Country of birth:                                              |                                                                       |                                            |                                          |
| 4) Home address:                                                  |                                                                       |                                            |                                          |
| 5) E-mail address:                                                |                                                                       |                                            |                                          |
| 6a) Telephone no.:                                                |                                                                       | 6b) Mobile no.:                            |                                          |
| 7) Country where you obtained your medical undergrad. degree:     |                                                                       |                                            |                                          |
| 8) Years of practice as a doctor (in total):                      |                                                                       |                                            |                                          |
| 9a) Year of specialisation in family medicine (if specialised):   |                                                                       |                                            |                                          |
| 9b) Did you fall under the 'grandfather clause' <sup>1</sup> ?    | <input type="checkbox"/> Yes                                          | <input type="checkbox"/> No                |                                          |
| 9c) Are you currently a trainee?                                  | <input type="checkbox"/> Yes                                          | <input type="checkbox"/> No                |                                          |
| 10) Years of practice as a GP:                                    |                                                                       |                                            |                                          |
| 11) How much do you currently work?                               | <input type="checkbox"/> Part-time <input type="checkbox"/> Full-time |                                            |                                          |
| 12) Approximately how many patients do you meet daily?            |                                                                       |                                            |                                          |
| 13) Health sector of practice (please tick all relevant options): | Type of Sector                                                        | Location                                   |                                          |
|                                                                   | <input type="checkbox"/> Public sector                                | <input type="checkbox"/> Healthcare centre | <input type="checkbox"/> Home visits     |
|                                                                   | <input type="checkbox"/> Solo practice                                | <input type="checkbox"/> Private clinic    | <input type="checkbox"/> Pharmacy clinic |
|                                                                   |                                                                       | <input type="checkbox"/> Home visits       |                                          |
|                                                                   | <input type="checkbox"/> Group practice                               | <input type="checkbox"/> Private clinic    | <input type="checkbox"/> Pharmacy clinic |
|                                                                   | <input type="checkbox"/> Home visits                                  |                                            |                                          |
| <input type="checkbox"/> Company doctor                           |                                                                       |                                            |                                          |

<sup>1</sup> Being recognised as a fully competent specialist in family medicine, on the basis of acquired experience.

| 14) Areas within which you conduct home visits (if applicable):                                                                                                        |                                          |
|------------------------------------------------------------------------------------------------------------------------------------------------------------------------|------------------------------------------|
| 15) Please write the addresses of your practice/s and tick your main clinic of practice:<br>(N.B. if you work in a pharmacy, please include the name of that pharmacy) |                                          |
| Address                                                                                                                                                                | Main clinic of practice<br>(please tick) |
|                                                                                                                                                                        | <input type="checkbox"/>                 |

Thank you for your input!

Figure S1. General practitioner (GP) demographics form

## 1 SUPPLEMENTARY FILES (2)

2 **Table S1. General practitioner (GP) characteristics (n=33)**

|                                     |                            | <b>n</b> | <b>(%)</b> |
|-------------------------------------|----------------------------|----------|------------|
| <b>Sex</b>                          | male                       | 24       | (72.7)     |
|                                     | female                     | 9        | (27.3)     |
| <b>Age (years)</b>                  | 28-39                      | 7        | (21.2)     |
|                                     | 40-49                      | 9        | (27.3)     |
|                                     | 50-59                      | 14       | (42.4)     |
|                                     | ≥60                        | 3        | (9.1)      |
| <b>Years of GP practice (n=32)</b>  | <10                        | 6        | (18.7)     |
|                                     | 10-19                      | 5        | (15.6)     |
|                                     | 20-29                      | 14       | (43.8)     |
|                                     | ≥30                        | 7        | (21.9)     |
| <b>GP trainee</b>                   | no                         | 30       | (90.9)     |
|                                     | yes                        | 3        | (9.1)      |
| <b>Type of employment</b>           | part-time                  | 11       | (33.3)     |
|                                     | full-time                  | 22       | (66.7)     |
| <b>Practice location</b>            | public healthcentre clinic | 13       | (39.4)     |
|                                     | private clinic             | 14       | (42.4)     |
|                                     | private pharmacy clinic    | 11       | (33.3)     |
| <b>Type of practice<sup>†</sup></b> | group                      | 16       | (48.5)     |
|                                     | solo                       | 17       | (51.5)     |

NOTE. <sup>†</sup>GPs working in public sector healthcentres were defined as group practice practitioners

## 3 SUPPLEMENTARY FILES (3)

4

**Table S2. Sociodemographic and lifestyle characteristics of patients with acute respiratory tract complaints**

|                                                     |                 | n     | (%)    |
|-----------------------------------------------------|-----------------|-------|--------|
| <b>Sex</b> (n=4,508)                                | male            | 2,113 | (46.9) |
|                                                     | female          | 2,395 | (53.1) |
| <b>Age (years)</b> (n=4,511)                        | <5              | 544   | (12.1) |
|                                                     | 5-11            | 571   | (12.7) |
|                                                     | 12-17           | 357   | (7.9)  |
|                                                     | 18-24           | 467   | (10.3) |
|                                                     | 25-44           | 1,285 | (28.5) |
|                                                     | 45-64           | 790   | (17.5) |
|                                                     | ≥65             | 497   | (11.0) |
| <b>Educational level</b> (n=4,484)                  | pre-school      | 496   | (11.1) |
|                                                     | primary         | 751   | (16.7) |
|                                                     | secondary       | 1,803 | (40.2) |
|                                                     | upper-secondary | 776   | (17.3) |
|                                                     | tertiary        | 545   | (12.2) |
| <b>Household size (persons/household)</b> (n=4,465) | none achieved   | 113   | (2.5)  |
|                                                     | 1-2             | 1,087 | (24.3) |
|                                                     | 3-4             | 2,687 | (60.2) |
| <b>Contact with children &lt;5 years</b> (n=4,481)  | ≥5              | 691   | (15.5) |
|                                                     | no              | 2,881 | (64.3) |
| <b>Current smoker</b> (n=4,453)                     | yes             | 1,600 | (35.7) |
|                                                     | no              | 3,718 | (83.5) |
|                                                     | yes             | 735   | (16.5) |
